# Supplementary material
Source: publisher figshare collection journal article supplement (https://geolsoc.figshare.com/ndownloader/files/14670992)
Supplement: Supplementary file 1 [file 14670992]

## Sheet: Appendix 2 U-Pb data
Core name	Formation	Sample	Analysis No.	207Pb/235U	2 S.E.	206Pb/238 U	2 S.E.	Rho	207Pb/235U age (Ma)	2 S.E.	206Pb/238U age (Ma)	2 S.E.	207Pb/206Pb age (Ma)	2 S.E.	Concordance (%)
Elliott-1	Kyalla Fm.	EN-Ky4	9-EN4-1	4.37	0.13	0.3006	0.0087	0.67084	1705	25	1691	43	1732	45	97.5754
			10-EN4-2	5.11	0.1	0.3191	0.008	0.73606	1835	17	1783	39	1898	30	93.5502
			12-EN4-4	3.91	0.13	0.277	0.0071	0.64938	1615	30	1578	37	1699	50	92.3321
			13-EN4-5	5.02	0.17	0.312	0.011	0.6474	1817	29	1750	53	1898	52	91.5429
			15-EN4-7	4.95	0.14	0.3147	0.009	0.74859	1815	23	1762	44	1890	36	92.7355
			16-EN4-8	9.64	0.24	0.442	0.012	0.76041	2410	22	2371	54	2451	29	96.6259
			18-EN4-10	4.45	0.2	0.3	0.011	0.58409	1743	37	1687	53	1793	62	93.7167
			20-EN4-12	4.27	0.12	0.288	0.011	0.62804	1685	22	1629	55	1751	56	92.5107
			23-EN4-15	4.13	0.13	0.2848	0.009	0.73447	1656	27	1614	45	1702	47	94.5477
			32-EN4-16	4.54	0.13	0.3107	0.0095	0.70493	1739	25	1745	47	1755	39	99.4269
			34-EN4-18	4.37	0.13	0.299	0.011	0.72221	1703	25	1685	52	1748	38	96.2611
			37-EN4-21	3.78	0.11	0.2714	0.0074	0.33123	1588	25	1546	38	1639	60	93.9845
			38-EN4-22	3.65	0.15	0.275	0.011	0.53699	1568	33	1562	54	1599	86	97.6312
			39-EN4-23	4.32	0.13	0.2969	0.0089	0.58568	1703	26	1674	44	1775	49	93.9665
			41-EN4-25	4.58	0.23	0.303	0.012	0.79287	1739	42	1703	62	1787	60	95.0675
			43-EN4-27	4.29	0.15	0.289	0.01	0.66926	1687	29	1641	49	1732	49	94.4546
			44-EN4-28	4.6	0.17	0.3044	0.0088	0.60099	1742	31	1711	43	1790	56	95.3828
			45-EN4-29	5.01	0.14	0.3263	0.0099	0.71708	1822	25	1827	48	1844	43	99.0695
			46-EN4-30	4.92	0.14	0.3184	0.0084	0.61062	1801	24	1785	40	1819	37	98.0952
			58-EN4-34	8.39	0.32	0.399	0.015	0.81588	2270	35	2178	65	2356	34	91.8274
			59-EN4-35	4.05	0.11	0.2819	0.0082	0.74801	1640	23	1604	42	1655	37	96.8204
			60-EN4-36	4.82	0.16	0.311	0.01	0.4517	1787	28	1742	50	1803	64	96.4983
			63-EN4-39	4.87	0.13	0.3229	0.0099	0.77496	1798	21	1809	47	1747	35	103.427
			64-EN4-40	4.14	0.12	0.2776	0.0092	0.76815	1659	24	1578	47	1711	44	91.5716
			65-EN4-41	4.478	0.097	0.3046	0.0073	0.70858	1728	18	1712	36	1684	30	101.636
			66-EN4-42	5.22	0.13	0.3277	0.0088	0.44345	1857	20	1826	43	1806	53	101.095
			67-EN4-43	4.7	0.12	0.3146	0.0092	0.44302	1771	20	1768	46	1700	50	103.846
			68-EN4-44	5.05	0.13	0.326	0.0079	0.63407	1824	22	1817	38	1791	43	101.431
			69-EN4-45	4.42	0.12	0.302	0.008	0.72437	1715	22	1699	40	1680	36	101.118
			78-EN4-46	4.87	0.13	0.3074	0.0094	0.60034	1795	24	1725	47	1810	48	95.0725
			79-EN4-47	3.85	0.15	0.26	0.011	0.76528	1604	33	1487	56	1631	54	90.3161
			80-EN4-48	5.1	0.15	0.3234	0.0091	0.64554	1831	25	1810	45	1761	41	102.707
			81-EN4-49	4.92	0.22	0.314	0.016	0.81487	1810	35	1759	79	1754	54	100.284
			82-EN4-50	4.44	0.17	0.307	0.012	0.62592	1723	30	1728	59	1641	57	105.035
			83-EN4-51	4.02	0.11	0.2778	0.0074	0.76591	1634	21	1578	37	1620	35	97.3384
			84-EN4-52	4.48	0.12	0.3081	0.0092	0.742	1724	22	1729	45	1650	35	104.569
			85-EN4-53	4.56	0.13	0.2996	0.0084	0.75409	1745	22	1693	43	1692	31	100.059
			88-EN4-56	9.13	0.25	0.413	0.012	0.62641	2352	25	2226	53	2367	36	93.6658
			92-EN4-60	4.204	0.094	0.2922	0.0073	0.74654	1671	19	1651	37	1640	30	100.666
			102-EN4-61	5.11	0.17	0.33	0.012	0.57979	1838	29	1835	60	1781	62	102.943
			103-EN4-62	4.84	0.13	0.3215	0.008	0.63564	1790	22	1795	39	1757	40	102.117
			105-EN4-64	5.57	0.17	0.3459	0.0093	0.64968	1911	26	1913	45	1851	43	103.241
			106-EN4-65	4.58	0.1	0.3099	0.0075	0.8078	1745	18	1747	37	1714	23	101.889
			108-EN4-67	3.67	0.13	0.267	0.012	0.58213	1562	29	1525	61	1517	58	100.525
			109-EN4-68	3.67	0.15	0.2683	0.0082	0.63381	1561	31	1531	42	1553	54	98.563
			111-EN4-70	5.02	0.11	0.324	0.0078	0.62075	1822	19	1807	38	1795	37	100.664
			112-EN4-71	4.55	0.12	0.3026	0.0085	0.46199	1741	22	1702	42	1720	47	98.9424
			113-EN4-72	4.83	0.11	0.3121	0.0073	0.46717	1787	19	1749	36	1784	39	97.9989
			114-EN4-73	4.22	0.16	0.282	0.013	0.68419	1675	31	1601	63	1725	47	92.2548
			116-EN4-75	11.03	0.37	0.478	0.018	0.72622	2524	32	2522	75	2517	43	100.198
			126-EN4-77	4.4	0.13	0.304	0.011	0.66204	1710	24	1708	54	1707	51	100.059
			127-EN4-78	5.29	0.14	0.337	0.01	0.58299	1869	22	1859	50	1824	48	101.883
			128-EN4-79	4.22	0.1	0.2965	0.008	0.59543	1678	21	1676	39	1693	42	98.9857
			129-EN4-80	4.66	0.13	0.305	0.011	0.45911	1757	24	1715	52	1846	57	92.3615
			131-EN4-82	16.61	0.31	0.542	0.013	0.75695	2912	19	2801	54	2991	24	93.2167
			132-EN4-83	4.58	0.19	0.309	0.01	0.47874	1736	36	1735	51	1737	68	99.8847
			136-EN4-87	4.18	0.11	0.2906	0.0076	0.68843	1667	21	1643	38	1743	37	93.9136
			137-EN4-88	4.63	0.22	0.314	0.012	0.33628	1751	40	1757	61	1732	79	101.423
			138-EN4-89	4.43	0.15	0.309	0.011	0.593	1722	28	1735	53	1722	50	100.749
			148-EN4-91	5.09	0.12	0.3345	0.0084	0.71681	1835	20	1857	40	1866	31	99.5153
			149-EN4-92	4.73	0.15	0.313	0.011	0.45177	1771	26	1753	52	1816	60	96.4062
			150-EN4-93	4.08	0.24	0.281	0.017	0.50537	1643	50	1592	84	1720	110	91.9598
			151-EN4-94	10.22	0.22	0.457	0.01	0.63459	2454	20	2422	46	2500	31	96.7795
			152-EN4-95	5.08	0.13	0.3296	0.0095	0.749	1834	23	1834	46	1835	34	99.9455
			156-EN4-99	6.09	0.3	0.354	0.015	0.59377	1991	45	1953	70	2073	68	93.8556
			157-EN4-100	3.95	0.17	0.285	0.011	0.47147	1620	35	1612	55	1739	77	92.1216
			158-EN4-101	4.67	0.1	0.3132	0.0083	0.69371	1758	19	1754	41	1814	29	96.5792
			159-EN4-102	4.46	0.13	0.312	0.0092	0.57626	1723	23	1749	45	1746	43	100.172
			161-EN4-104	10.56	0.27	0.461	0.015	0.81842	2484	24	2437	68	2540	32	95.7735
			162-EN4-105	4.33	0.11	0.3039	0.008	0.45037	1699	21	1708	40	1748	48	97.6581
			172-EN4-107	4.2	0.15	0.284	0.011	0.80073	1671	29	1608	57	1764	46	90.2985
			173-EN4-108	4.512	0.092	0.304	0.0071	0.60634	1733	17	1709	35	1798	33	94.7923
			181-EN4-116	4.68	0.12	0.3203	0.0079	0.53732	1769	21	1789	38	1787	40	100.112
			182-EN4-117	4.6	0.13	0.3167	0.0084	0.48818	1750	24	1771	41	1767	46	100.226
			184-EN4-119	4.29	0.12	0.2942	0.0085	0.71126	1688	23	1661	42	1741	31	95.1836
			195-EN4-122	5.53	0.12	0.345	0.0083	0.72234	1905	19	1908	40	1928	30	98.9518
			196-EN4-123	15.6	1.1	0.535	0.028	0.679	2868	60	2760	120	2986	96	91.8116
			197-EN4-124	5.15	0.11	0.3308	0.0085	0.70468	1843	17	1839	41	1861	27	98.8037
			199-EN4-126	7.78	0.19	0.396	0.012	0.67251	2203	22	2148	56	2204	34	97.3929
			200-EN4-127	3.95	0.12	0.2852	0.0084	0.64208	1626	27	1616	42	1657	40	97.4629
			201-EN4-128	3.77	0.11	0.2695	0.0076	0.63756	1582	24	1537	39	1622	43	94.4697
			202-EN4-129	10.44	0.3	0.462	0.013	0.68094	2473	26	2445	56	2498	38	97.8323
			205-EN4-132	4.65	0.17	0.316	0.015	0.72076	1755	32	1767	75	1774	57	99.6038
			206-EN4-133	5.77	0.16	0.353	0.01	0.80511	1940	25	1948	49	1939	30	100.462
			207-EN4-134	4.45	0.14	0.301	0.01	0.65117	1722	26	1696	49	1718	44	98.7028
			219-EN4-138	4.724	0.094	0.3173	0.0084	0.71203	1769	17	1774	41	1747	32	101.522
			221-EN4-140	4.28	0.12	0.286	0.011	0.61025	1687	23	1618	54	1760	59	91.2237
			222-EN4-141	4.45	0.14	0.296	0.018	0.8074	1721	26	1670	92	1750	70	95.2096
			224-EN4-143	5.37	0.3	0.337	0.019	0.72102	1874	48	1870	90	1914	63	97.6471
			226-EN4-145	4.23	0.12	0.291	0.011	0.79777	1677	24	1644	54	1698	41	96.7153
			228-EN4-147	4.03	0.24	0.272	0.017	0.40034	1636	47	1549	86	1673	66	91.9948
			229-EN4-148	4.21	0.13	0.294	0.011	0.85396	1673	25	1658	53	1680	34	98.6731
			Rejected disconcordant analyses
			011-EN4-3	3.93	0.11	0.2529	0.0081	0.548286	1617	24	1452	42	1857	42	72.1074
			014-EN4-6	3.066	0.082	0.2155	0.0078	0.498143	1422	21	1257	41	1727	40	62.6094
			019-EN4-11	3.95	0.12	0.2528	0.0077	0.725776	1620	24	1452	40	1876	40	70.7989
			021-EN4-13	2.563	0.063	0.1738	0.0064	0.737082	1293	19	1033	35	1814	47	24.395
			035-EN4-19	3.24	0.12	0.218	0.0072	0.692857	1461	30	1270	38	1791	53	58.9764
			040-EN4-24	2.58	0.078	0.1747	0.006	0.719061	1300	22	1037	33	1726	46	33.5583
			042-EN4-26	3.27	0.11	0.2187	0.0074	0.686235	1477	26	1274	39	1746	46	62.9513
			057-EN4-33	2.785	0.083	0.2038	0.0074	0.655184	1349	22	1195	39	1532	62	71.7992
			061-EN4-37	3.46	0.15	0.227	0.01	0.650571	1515	34	1316	54	1778	46	64.8936
			062-EN4-38	2.61	0.13	0.1788	0.0082	0.694837	1301	36	1060	45	1715	62	38.2075
			086-EN4-54	3.47	0.18	0.2329	0.0088	0.735469	1526	39	1349	46	1712	62	73.0912
			090-EN4-58	3.36	0.15	0.2141	0.0097	0.821541	1492	34	1250	52	1778	43	57.76
			107-EN4-66	3.67	0.12	0.2331	0.0083	0.664459	1563	26	1349	44	1785	54	67.6798
			110-EN4-69	3.23	0.12	0.2156	0.0096	0.726561	1462	29	1257	51	1699	35	64.8369
			125-EN4-76	3.67	0.14	0.244	0.011	0.622704	1562	30	1407	55	1757	63	75.1244
			134-EN4-85	2.7	0.11	0.1857	0.0074	0.823878	1325	31	1097	40	1671	48	47.6755
			139-EN4-90	3.9	0.19	0.242	0.016	0.735735	1610	40	1395	85	1888	69	64.6595
			160-EN4-103	2.75	0.092	0.1905	0.008	0.814051	1344	26	1123	43	1743	46	44.7907
			171-EN4-106	3.6	0.2	0.243	0.013	0.40851	1546	45	1400	65	1840	80	68.5714
			174-EN4-109	3.63	0.1	0.237	0.01	0.871388	1555	22	1369	53	1851	42	64.7918
			176-EN4-111	3.3	0.13	0.229	0.011	0.74626	1478	31	1328	57	1710	68	71.2349
			178-EN4-113	3.6	0.1	0.2309	0.0078	0.78392	1546	23	1338	41	1851	42	61.6592
			198-EN4-125	3.77	0.16	0.246	0.018	0.68283	1586	34	1415	93	1791	54	73.4276
			203-EN4-130	3.43	0.1	0.2341	0.0098	0.53266	1509	23	1355	51	1739	43	71.6605
			208-EN4-135	0.302	0.019	0.1649	0.0099	0.70076	267	14	983	54	1520	56	45.3713
Elliott-1	Moroak Sst.	EN-Mo8	240-EN8-1	4.3	0.17	0.292	0.01	0.62924	1693	32	1649	51	1691	50	97.453
			241-EN8-2	4.57	0.16	0.3059	0.0097	0.64495	1738	29	1732	48	1705	51	101.559
			243-EN8-4	4.119	0.099	0.2891	0.0097	0.61624	1665	22	1635	49	1682	54	97.1254
			248-EN8-9	4.2	0.15	0.285	0.0095	0.64246	1673	27	1614	48	1676	54	96.1586
			249-EN8-10	4.73	0.13	0.3109	0.009	0.7292	1770	24	1742	44	1726	35	100.918
			250-EN8-11	4.9	0.15	0.328	0.01	0.64902	1799	26	1827	49	1692	43	107.389
			252-EN8-13	3.71	0.11	0.2564	0.0095	0.7343	1571	23	1470	49	1667	35	86.5986
			253-EN8-14	4.52	0.14	0.3093	0.0092	0.77992	1737	24	1735	46	1697	33	102.19
			254-EN8-15	4.65	0.11	0.3156	0.0078	0.59934	1763	19	1766	38	1682	35	104.757
			264-EN8-17	4.18	0.13	0.3082	0.0092	0.74767	1665	25	1730	45	1567	42	109.422
			265-EN8-18	4.92	0.13	0.3328	0.0089	0.62364	1804	22	1849	43	1776	33	103.948
			266-EN8-19	5.01	0.12	0.3324	0.0085	0.69658	1824	22	1857	40	1786	34	103.823
			267-EN8-20	4.77	0.28	0.323	0.013	0.68171	1771	50	1807	66	1710	140	105.368
			268-EN8-21	3.81	0.12	0.2886	0.0084	0.76858	1606	26	1633	42	1561	43	104.409
			269-EN8-22	4.37	0.13	0.3047	0.0087	0.80432	1711	24	1712	43	1709	33	100.175
			270-EN8-23	4.32	0.12	0.2988	0.0095	0.80685	1696	23	1683	47	1697	34	99.1682
			271-EN8-24	4.09	0.12	0.2914	0.0072	0.64115	1655	23	1647	36	1710	29	96.1749
			273-EN8-26	4.57	0.12	0.3073	0.0081	0.5521	1740	22	1725	40	1742	38	99.0145
			274-EN8-27	4.21	0.11	0.2886	0.0085	0.83437	1676	22	1632	43	1701	43	95.7721
			275-EN8-28	4.5	0.15	0.314	0.01	0.75342	1734	27	1758	51	1658	60	105.688
			276-EN8-30	10.58	0.25	0.469	0.012	0.38478	2485	23	2489	52	2467	22	100.884
			286-EN8-32	4.77	0.14	0.3012	0.008	0.31994	1784	26	1700	39	1823	31	92.7647
			287-EN8-33	4.59	0.18	0.3016	0.0096	0.54611	1745	32	1704	46	1700	61	100.235
			288-EN8-34	4.72	0.14	0.3035	0.0086	0.54262	1768	26	1706	42	1775	61	95.9555
			289-EN8-35	4.27	0.17	0.285	0.012	0.51585	1684	32	1627	60	1696	74	95.7591
			293-EN8-39	4.69	0.14	0.311	0.008	0.59274	1759	26	1743	40	1718	48	101.434
			295-EN8-41	4.7	0.14	0.3157	0.0089	0.43688	1765	26	1771	43	1738	38	101.863
			296-EN8-42	3.75	0.11	0.277	0.0066	0.39021	1587	22	1575	33	1580	42	99.6825
			299-EN8-45	3.34	0.13	0.2497	0.0086	0.54219	1489	32	1435	45	1550	83	91.9861
			313-EN8-51	3.75	0.15	0.278	0.01	0.28194	1584	33	1581	51	1502	75	104.997
			317-EN8-55	3.8	0.11	0.2689	0.0083	0.66012	1586	25	1533	42	1616	44	94.5858
			320-EN8-58	3.63	0.16	0.26	0.011	0.74626	1557	34	1499	54	1527	50	98.1321
			335-EN8-65	3.8	0.16	0.2993	0.0073	0.79805	1591	33	1686	36	1613	73	104.33
			336-EN8-66	3.644	0.086	0.2938	0.007	0.80953	1556	19	1658	35	1558	46	106.031
			338-EN8-68	18.85	0.48	0.615	0.016	0.60625	3033	25	3084	63	3073	26	100.357
			341-EN8-71	3.62	0.13	0.2879	0.0079	0.73268	1561	29	1634	39	1565	62	104.223
			343-EN8-73	4.67	0.13	0.326	0.01	0.78187	1759	23	1826	50	1707	31	106.517
			344-EN8-74	4.43	0.17	0.315	0.012	0.71045	1721	31	1763	58	1696	46	103.8
			345-EN8-75	4.56	0.19	0.308	0.011	0.78061	1738	36	1729	56	1700	50	101.677
			354-EN8-76	4.32	0.14	0.2899	0.0084	0.6643	1700	26	1639	42	1769	51	92.0683
			357-EN8-79	4.4	0.15	0.2998	0.0089	0.75732	1705	28	1688	44	1702	63	99.1706
			358-EN8-80	4.9	0.13	0.3307	0.0097	0.64511	1798	22	1839	47	1742	39	105.275
			359-EN8-81	3.67	0.15	0.2638	0.0088	0.78579	1561	32	1507	45	1607	33	93.3643
			361-EN8-83	4.31	0.11	0.2918	0.008	0.63841	1691	21	1653	40	1717	30	96.1283
			364-EN8-86	4.95	0.17	0.321	0.011	0.71655	1805	30	1797	57	1738	59	103.283
			365-EN8-87	4.46	0.16	0.312	0.0094	0.88573	1722	29	1748	46	1678	60	104.005
			366-EN8-88	3.67	0.13	0.2661	0.0074	0.80102	1562	27	1519	37	1600	44	94.6675
			367-EN8-89	4.6	0.12	0.3195	0.0083	0.63491	1757	24	1785	40	1715	31	103.922
			368-EN8-90	3.83	0.12	0.2802	0.0079	0.62712	1593	25	1590	40	1563	37	101.698
			388-EN8-102	3.473	0.084	0.2769	0.0073	0.796541	1521	20	1579	37	1551	33	101.773
			390-EN8-104	8.52	0.27	0.442	0.014	0.677857	2284	29	2358	61	2342	31	100.679
			391-EN8-105	5.034	0.092	0.3394	0.0073	0.772776	1825	15	1882	35	1818	25	103.401
			400-EN8-106	4.76	0.15	0.3013	0.0088	0.658276	1776	28	1695	44	1705	43	99.41
			401-EN8-107	10.66	0.33	0.449	0.012	0.801827	2489	29	2388	55	2476	32	96.3149
			403-EN8-109	4.85	0.2	0.309	0.011	0.749765	1791	35	1733	54	1714	34	101.096
			405-EN8-111	4.83	0.13	0.3119	0.0082	0.814337	1786	23	1748	40	1729	36	101.087
			412-EN8-118	4.41	0.13	0.302	0.0083	0.618622	1721	26	1699	41	1748	39	97.116
			413-EN8-119	4.052	0.087	0.2955	0.008	0.460378	1645	18	1667	40	1598	46	104.139
			414-EN8-120	3.59	0.18	0.279	0.011	0.747633	1548	37	1584	58	1555	72	101.831
			Rejected disconcordant analyses
			242-EN8-3	3.21	0.1	0.2199	0.0056	0.63347	1460	25	1281	30	1671	46	69.555
			244-EN8-5	2.643	0.086	0.1979	0.0066	0.14989	1313	23	1163	35	1473	34	73.3448
			245-EN8-6	2.292	0.087	0.1741	0.0062	0.62996	1211	28	1034	34	1506	64	54.352
			247-EN8-8	3.081	0.083	0.2047	0.0065	0.5177	1428	21	1199	35	1730	44	55.7131
			251-EN8-12	10.72	0.3	0.349	0.011	0.76775	2502	25	1933	49	2958	24	46.9736
			263-EN8-16	2.402	0.089	0.188	0.0083	0.52296	1239	27	1115	44	1520	61	63.6771
			285-EN8-31	2.252	0.079	0.1468	0.0053	0.51468	1194	25	882	30	1727	42	4.19501
			290-EN8-36	4.69	0.18	0.2614	0.0086	0.71655	1764	33	1495	44	1702	57	86.1538
			292-EN8-38	3.417	0.084	0.2261	0.0065	0.88573	1513	18	1312	34	1736	36	67.6829
			297-EN8-43	2.418	0.088	0.1669	0.0067	0.544523	1249	27	994	37	1653	39	33.7022
			309-EN8-47	2.657	0.079	0.1744	0.0044	0.535902	1315	22	1035	24	1803	34	25.7971
			310-EN8-48	2.179	0.064	0.1293	0.0032	0.746095	1179	20	784	19	1676	35	-13.7755
			311-EN8-49	7.22	0.24	0.3239	0.0083	0.799406	2137	30	1808	40	2484	23	62.6106
			312-EN8-50	2.217	0.065	0.1424	0.0041	0.653776	1185	21	858	23	1812	20	-11.1888
			314-EN8-52	2.014	0.054	0.1512	0.0042	0.706449	1117	18	907	24	1484	31	36.3837
			315-EN8-53	3.063	0.072	0.2048	0.0055	0.652204	1423	18	1203	30	1692	41	59.3516
			319-EN8-57	3.71	0.11	0.2152	0.0063	0.771857	1573	25	1255	33	1961	45	43.745
			321-EN8-59	2.305	0.069	0.1684	0.005	0.528265	1214	21	1002	27	1561	55	44.2116
			337-EN8-67	2.044	0.052	0.1568	0.0042	0.783418	1130	17	941	23	1644	36	25.2922
			340-EN8-70	1.402	0.052	0.1084	0.0034	0.533633	889	22	663	20	1546	50	-33.1825
			342-EN8-72	1.972	0.066	0.1332	0.0052	0.525184	1108	21	811	31	1483	34	17.1393
			355-EN8-77	2.75	0.16	0.1587	0.0075	0.731173	1344	41	949	42	1646	76	26.5543
			356-EN8-78	3.614	0.073	0.236	0.0052	0.735469	1550	16	1365	27	1800	27	68.1319
			360-EN8-82	2.934	0.095	0.2069	0.0061	0.821541	1387	25	1211	33	1649	37	63.8315
			362-EN8-84	2.89	0.14	0.188	0.011	0.664459	1373	37	1106	58	1777	47	39.3309
			379-EN8-93	3.407	0.097	0.2289	0.0079	0.47317	1506	23	1327	41	1791	34	65.0339
			382-EN8-96	3.67	0.18	0.2149	0.0084	0.59215	1567	41	1252	44	2144	29	28.754
			385-EN8-99	9.86	0.34	0.405	0.015	0.642816	2417	32	2190	69	2695	34	76.9406
			386-EN8-100	2.666	0.081	0.1967	0.0074	0.482827	1317	23	1156	40	1673	45	55.2768
			389-EN8-103	2.824	0.09	0.2078	0.0067	0.604235	1358	24	1216	36	1688	30	61.1842
			404-EN8-110	3.88	0.16	0.252	0.01	0.799406	1607	34	1446	52	1753	68	78.769
			406-EN8-112	2.74	0.11	0.195	0.0079	0.750479	1337	31	1147	43	1542	61	65.5623
			407-EN8-113	1.952	0.045	0.1418	0.0041	0.838307	1097	15	854	23	1519	32	22.1311
			408-EN8-114	1.881	0.074	0.1428	0.006	0.67802	1072	26	860	34	1460	44	30.2326
			410-EN8-116	2.352	0.07	0.1763	0.0055	0.737082	1237	22	1046	30	1578	40	49.1396
			411-EN8-117	1.745	0.045	0.1326	0.0027	0.692857	1022	17	803	15	1527	34	9.83811
			272-EN8-25	3.395	0.082	0.2367	0.0068	0.53284	1502	19	1368	36	1768	37	70.7602
			291-EN8-37	3.82	0.11	0.2572	0.0076	0.62597	1596	23	1474	39	1678	39	86.1601
			308-EN8-46	3.53	0.12	0.2419	0.0086	0.79399	1534	27	1395	45	1704	48	77.8495
			316-EN8-54	3.26	0.1	0.2306	0.0067	0.37576	1467	25	1344	33	1578	50	82.5893
			318-EN8-56	3.55	0.11	0.2454	0.0091	0.6433	1541	26	1413	47	1583	44	87.9689
			322-EN8-60	3.55	0.12	0.2478	0.0083	0.78392	1541	26	1426	43	1685	56	81.8373
			331-EN8-61	2.888	0.082	0.2239	0.009	0.68283	1377	21	1301	48	1690	51	70.0999
			332-EN8-62	2.506	0.07	0.2	0.0068	0.53266	1271	20	1174	36	1611	32	62.7768
			333-EN8-63	3.232	0.098	0.2435	0.0084	0.70076	1464	23	1403	43	1691	45	79.4726
			339-EN8-69	2.827	0.066	0.2213	0.006	0.45117	1367	17	1287	32	1539	34	80.4196
			363-EN8-85	3.5	0.11	0.2504	0.0071	0.73477	1531	25	1439	36	1636	39	86.3099
			377-EN8-91	3.075	0.097	0.2327	0.007	0.56882	1429	26	1347	37	1562	49	84.0386
			380-EN8-94	3.648	0.099	0.2638	0.006	0.6669	1567	22	1508	31	1721	38	85.8753
			383-EN8-97	2.584	0.066	0.2066	0.0056	0.747633	1296	18	1210	30	1560	41	71.0744
			384-EN8-98	3.48	0.13	0.2602	0.0094	0.797827	1524	31	1489	48	1697	49	86.0309
			387-EN8-101	2.98	0.12	0.219	0.0088	0.724949	1396	32	1275	46	1661	47	69.7255
			402-EN8-108	3.265	0.085	0.2318	0.0062	0.651439	1471	21	1342	32	1549	30	84.5753
			409-EN8-115	4.13	0.12	0.265	0.0089	0.826051	1660	23	1519	44	1817	34	80.3818
Jamison-1	Kyalla	JN-Ky6	9-JN6-1	4.16	0.18	0.294	0.013	0.64024	1664	35	1661	64	1719	49	96.5081
			10-JN6-2	5.14	0.14	0.302	0.01	0.63347	1840	23	1698	51	1794	180	94.3463
			11-JN6-3	3.51	0.3	0.262	0.012	0.014989	1502	67	1497	61	1360	47	109.152
			12-JN6-4	4.47	0.15	0.28	0.01	0.62996	1728	29	1588	51	1712	52	92.1914
			15-JN6-7	4.91	0.11	0.3034	0.0093	0.47317	1803	19	1706	46	1811	34	93.8453
			19-JN6-11	4.31	0.1	0.2914	0.0078	0.59215	1699	18	1647	39	1718	53	95.6891
			204-JN6-03	4.26	0.12	0.3001	0.0088	0.52296	1687	23	1690	44	1710	30	98.8166
			205-JN6-04	5.048	0.094	0.3301	0.0049	0.51468	1827	15	1838	24	1811	33	101.469
			206-JN6-05	4.311	0.099	0.2956	0.0046	0.40769	1697	18	1669	23	1775	55	93.6489
			208-JN6-07	4.12	0.15	0.2924	0.0074	0.41878	1654	29	1652	37	1737	47	94.8547
			220-JN6-11	4.91	0.16	0.323	0.01	0.6407	1808	26	1805	49	1745	47	103.324
			221-JN6-12	4.04	0.14	0.279	0.0071	0.69232	1639	29	1586	36	1671	63	94.6406
			226-JN6-17	2.93	0.18	0.233	0.01	0.63916	1398	43	1351	54	1428	56	94.3005
			241-JN6-23	4.15	0.19	0.286	0.01	0.75642	1660	37	1622	52	1718	120	94.0814
			242-JN6-24	3.06	0.26	0.242	0.017	0.5177	1425	66	1394	86	1420	49	98.1349
			243-JN6-25	4.28	0.19	0.287	0.01	0.76775	1688	38	1628	51	1740	38	93.1204
			244-JN6-26	4.55	0.1	0.3093	0.006	0.5064	1738	18	1736	29	1702	40	101.959
			247-JN6-29	4.99	0.14	0.3136	0.008	0.57491	1819	24	1757	39	1883	87	92.8287
			248-JN6-30	4.72	0.28	0.316	0.014	0.6351	1765	49	1768	69	1795	73	98.4729
			254-JN6-36	4.11	0.17	0.2833	0.0068	0.36485	1652	34	1607	34	1727	51	92.5327
			265-JN6-39	4.37	0.15	0.3028	0.0094	0.43711	1708	30	1704	47	1742	40	97.77
			267-JN6-41	4.56	0.11	0.3068	0.009	0.60858	1740	21	1724	44	1813	96	94.8376
			274-JN6-48	4.2	0.24	0.289	0.01	0.42549	1668	47	1635	51	1748	84	93.0887
			278-JN6-52	3.85	0.16	0.281	0.01	0.43224	1608	31	1596	52	1663	61	95.802
			290-JN6-56	3.84	0.14	0.275	0.0076	0.45086	1598	29	1565	38	1653	38	94.377
			321-JN6-79	4.52	0.1	0.3028	0.0077	0.66305	1732	19	1703	38	1749	56	97.2989
			325-JN6-83	4.17	0.13	0.2857	0.0065	0.42774	1664	25	1619	33	1724	67	93.5145
			340-JN6-90	4.38	0.17	0.2947	0.009	0.61022	1710	33	1663	45	1699	110	97.8352
			343-JN6-93	4.44	0.27	0.293	0.012	0.40471	1716	53	1655	59	1750	39	94.2598
			357-JN6-99	4.56	0.12	0.3038	0.0078	0.65131	1741	22	1709	39	1768	43	96.5477
			371-JN6-113	4.596	0.097	0.3114	0.0079	0.46221	1747	18	1746	39	1804	55	96.6781
			380-JN6-114	4.3	0.13	0.2907	0.0073	0.50126	1689	25	1644	37	1753	74	93.3698
			381-JN6-115	4.44	0.23	0.294	0.015	0.17473	1716	42	1658	75	1792	81	91.918
			385-JN6-119	4.32	0.18	0.2989	0.0096	0.14576	1694	34	1683	48	1766	72	95.0683
			390-JN6-124	3.98	0.14	0.298	0.01	0.26815	1628	28	1681	50	1647	43	102.023
			394-JN6-128	5.26	0.16	0.3516	0.0081	0.59752	1868	24	1941	39	1847	47	104.843
			Rejected disconcordant analyses
			13-JN6-5	3.678	0.071	0.2549	0.0047	0.54344	1563	15	1404	25	1676	37	80.6268
			14-JN6-6	1.672	0.034	0.1132	0.0019	0.85838	1000	13	691	11	1733	28	-50.7959
			16-JN6-8	2.17	0.11	0.1535	0.0075	0.33134	1257	38	916	42	1691	32	15.393
			20-JN6-12	3.347	0.096	0.2467	0.005	0.47794	1490	22	1352	26	1596	60	81.9527
			21-JN6-13	5.503	0.099	0.2675	0.0038	0.67306	1900	15	1528	19	2331	26	47.4476
			22-JN6-14	2.032	0.057	0.1445	0.0033	0.55	1123	19	870	18	1682	44	6.66667
			219-JN6-10	2.483	0.053	0.1687	0.0036	0.34855	1268	16	1004	20	1684	46	32.2709
			227-JN6-18	4.43	0.11	0.28	0.0047	0.16277	1757	19	1591	24	1836	43	84.6009
			251-JN6-33	3.478	0.066	0.2387	0.0036	0.55459	1522	15	1379	19	1718	33	75.417
			252-JN6-34	2.257	0.074	0.1535	0.0044	0.50211	1198	22	920	24	1669	50	18.587
			269-JN6-43	3.781	0.075	0.2533	0.005	0.80388	1589	15	1414	25	1758	39	75.6719
			270-JN6-44	3.41	0.069	0.2309	0.0037	0.33093	1505	16	1339	20	1751	34	69.2308
			279-JN6-53	2.085	0.044	0.1503	0.0025	0.49335	1142	15	902	14	1655	37	16.5188
			280-JN6-54	5.37	0.16	0.2572	0.0058	0.20318	1879	26	1477	29	2346	42	41.1645
			298-JN6-64	4.196	0.095	0.2749	0.0046	0.18341	1691	18	1534	23	1825	43	81.03
			299-JN6-65	3.537	0.085	0.2242	0.0066	0.48988	1537	19	1302	34	1828	56	59.6006
			300-JN6-66	9.6	0.15	0.3878	0.0056	0.36485	2394	14	2111	26	2640	20	74.9408
			328-JN6-86	4.57	0.19	0.2818	0.0078	0.43711	1749	34	1579	39	1909	83	79.1007
			341-JN6-91	2.203	0.048	0.1583	0.0033	0.60858	1182	15	947	18	1650	31	25.7656
			359-JN6-101	3.38	0.11	0.2147	0.006	0.42549	1499	25	1257	31	1821	54	55.1313
			363-JN6-105	2.517	0.039	0.1768	0.0023	0.43224	1276	11	1049	13	1675	26	40.3241

## Sheet: Appendix 3 Lu-Hf result
Formation	Sample	Analysis	207Pb/206Pb age (Ma)	178Hf/177Hf	2.S.E.	Lu176/Hf177	Hf176/Hf177	2 S.E.	Hf/Hf(t)	eHf(t)	2 S.E.	T(DM)
Jamison sst.	J-UJ3	BY J3-102	1602	1.46726	0.000165631	0.000518372	0.281871	1.78399e-05	0.281855	3.15216	0.624397	2.10302
		BY J3-106	1583	1.46731	0.000202761	0.00124505	0.28194	2.55972e-05	0.281903	4.41214	0.895904	2.01122
		BY J3-12	1157	1.46726	0.000156988	0.00125957	0.28194	2.18604e-05	0.281913	-4.94938	0.765115	2.25164
		BY J3-122	1607	1.46723	0.000175088	0.000546188	0.281887	1.8531e-05	0.28187	3.81766	0.648586	2.06639
		BY J3-123	1196	1.46727	0.00016197	0.000549075	0.282117	1.78469e-05	0.282105	2.75903	0.62464	1.80879
		BY J3-22	1220	1.46729	0.00015379	0.000597607	0.282101	1.95273e-05	0.282087	2.6769	0.683456	1.83262
		BY J3-33	1135	1.46728	0.000143262	0.000569924	0.28212	1.63863e-05	0.282108	1.47425	0.573521	1.84034
		BY J3-36	1588	1.46724	0.000175814	0.000794524	0.281938	1.86088e-05	0.281914	4.94949	0.651308	1.98235
		BY J3-4	1597	1.4671	0.000220297	0.000648965	0.281743	1.67813e-05	0.281724	-1.60967	0.587344	2.38849
		BY J3-44	1183	1.46727	0.000172062	0.000592918	0.282107	1.98363e-05	0.282094	2.06458	0.694272	1.84141
		BY J3-51	1200	1.46727	0.000188181	0.000514022	0.282104	1.73761e-05	0.282093	2.42209	0.608165	1.83267
		BY J3-58	1596	1.46727	0.000155466	0.00186155	0.281948	2.85505e-05	0.281892	4.34326	0.999269	2.02567
		BY J3-64	1612	1.46728	0.000162116	0.000953259	0.281898	2.32391e-05	0.281869	3.89308	0.81337	2.06573
		BY J3-67	1607	1.46728	0.000180699	0.000663982	0.281919	1.90801e-05	0.281898	4.81106	0.667803	2.00579
		BY J3-8	1592	1.46721	0.00016102	0.00172565	0.281911	2.33095e-05	0.281859	3.07819	0.815833	2.09967
		BY J3-90	1591	1.46725	0.000184693	0.000948161	0.281898	2.19423e-05	0.281869	3.4078	0.767981	2.07879
	E-LJ2	BY E2-08	1594	1.46724	0.000173411	0.000853539	0.28192	2.07202e-05	0.281894	4.3516	0.725205	2.02358
		BY E2-103	1579	1.46728	0.000171406	0.00185885	0.281953	2.73592e-05	0.281897	4.12768	0.957574	2.02543
		BY E2-107	1577	1.46729	0.00023441	0.00180555	0.281918	3.36118e-05	0.281864	2.9016	1.17641	2.09865
		BY E2-111	1050	1.46731	0.00021657	0.000614116	0.282103	1.77931e-05	0.282091	-1.05696	0.622757	1.93026
		BY E2-131	1578	1.46728	0.000182551	0.000609996	0.281913	1.8345e-05	0.281895	4.03191	0.642076	2.03049
		BY E2-29	1142	1.46727	0.000163467	0.000686092	0.28209	2.05193e-05	0.282075	0.474275	0.718176	1.90737
		BY E2-30	1595	1.4673	0.000166242	0.00189233	0.281925	2.82745e-05	0.281868	3.47073	0.989609	2.0781
		BY E2-32	1605	1.46727	0.000186321	0.000730956	0.281886	2.13574e-05	0.281864	3.54401	0.747509	2.0815
		BY E2-34	1590	1.46733	0.000230087	0.00132422	0.281948	3.02333e-05	0.281908	4.77052	1.05817	1.99486
		BY E2-39	1612	1.46726	0.000177954	0.000883951	0.281929	1.82839e-05	0.281902	5.0441	0.639936	1.99551
		BY E2-54	1589	1.46726	0.000201949	0.000715626	0.281905	1.80463e-05	0.281883	3.86151	0.631621	2.04955
		BY E2-67	2186	1.46729	0.000225715	0.000917487	0.281268	2.94149e-05	0.28123	-5.56361	1.02952	3.08323
		BY E2-69	1579	1.46729	0.000189902	0.000761414	0.281908	2.26985e-05	0.281886	3.71693	0.794449	2.0505
	M-LJ3	BY M3-105	1620	1.46727	0.000187553	0.00143618	0.281908	3.03403e-05	0.281864	3.88193	1.06191	2.07271
		BY M3-118	1609	1.46728	0.00015056	0.00134289	0.281789	2.28523e-05	0.281748	-0.48379	0.799829	2.32957
		BY M3-12	1571	1.46721	0.000153507	0.000658865	0.281934	2.09543e-05	0.281915	4.5711	0.7334	1.99205
		BY M3-2	1577	1.46727	0.000142969	0.00144576	0.281949	2.35375e-05	0.281906	4.38223	0.823812	2.00832
		BY M3-31	1618	1.46725	0.000203748	0.00083036	0.281933	1.99589e-05	0.281907	5.3799	0.698562	1.97975
		BY M3-44	1612	1.46726	0.000167542	0.000868156	0.281796	2.15766e-05	0.28177	0.360859	0.755182	2.28064
		BY M3-56	1087	1.46723	0.000149645	0.000558236	0.282088	1.76359e-05	0.282077	-0.716875	0.617255	1.93798
		BY M3-77	1575	1.46721	0.000187417	0.000965538	0.281946	2.15823e-05	0.281917	4.75106	0.75538	1.98421
		BY M3-79	1575	1.4672	0.000166648	0.00110733	0.281927	2.22713e-05	0.281894	3.91225	0.779496	2.03543
		BY M3-83	1566	1.46726	0.000197397	0.000617171	0.281919	1.70804e-05	0.2819	3.94907	0.597813	2.0261
		BY M3-90	1597	1.46728	0.000193504	0.000689406	0.281936	2.13027e-05	0.281915	5.17872	0.745595	1.97545
	W-UJ9	BY W9-06	1155	1.46729	0.000150979	0.000889578	0.282114	1.85003e-05	0.282094	1.45362	0.647511	1.8572
		BY W9-09	1563	1.46729	0.000173642	0.000833746	0.281969	2.45805e-05	0.281944	5.42455	0.860316	1.93358
		BY W9-101	1560	1.46728	0.000153782	0.000956212	0.281934	2.34004e-05	0.281905	3.98526	0.819015	2.01917
		BY W9-107	1558	1.46726	0.000179904	0.000823506	0.281966	2.47627e-05	0.281941	5.21387	0.866694	1.94252
		BY W9-111	1568	1.46727	0.000142575	0.00087662	0.281932	1.86594e-05	0.281906	4.19508	0.653079	2.01266
		BY W9-114	1564	1.46728	0.000156614	0.000967957	0.281915	2.11289e-05	0.281887	3.41218	0.739513	2.0573
		BY W9-14	1556	1.4674	0.000140479	0.00170178	0.281768	2.70237e-05	0.281718	-2.77015	0.945828	2.42699
		BY W9-19	1073	1.46749	0.000129821	0.000806491	0.282064	3.44563e-05	0.282048	-2.06194	1.20597	2.0099
		BY W9-27	1561	1.46725	0.000233781	0.0012304	0.281906	2.70327e-05	0.281869	2.72429	0.946145	2.0969
		BY W9-36	1145	1.46729	0.000141637	0.000613832	0.282079	2.17932e-05	0.282066	0.219283	0.76276	1.92539
		BY W9-37	1554	1.46729	0.000174382	0.000877439	0.281898	2.01386e-05	0.281872	2.67566	0.70485	2.09437
		BY W9-42	1126	1.46731	0.00011548	0.000770095	0.282108	1.96239e-05	0.282092	0.706809	0.686838	1.88061
		BY W9-48	1086	1.46728	0.000145218	0.000726354	0.282033	2.0538e-05	0.282018	-2.80564	0.71883	2.06563
		BY W9-55	1559	1.46717	0.000187362	0.00146732	0.28194	2.55247e-05	0.281896	3.63717	0.893364	2.03963
		BY W9-74	1119	1.46731	0.000164549	0.000658314	0.282117	1.74738e-05	0.282103	0.936421	0.611585	1.86102
		BY W9-75	1051	1.46718	0.000203368	0.000748059	0.282102	1.88791e-05	0.282087	-1.16366	0.660768	1.93761
	A-UJ1	BY_A1-10	1497	1.46718	0.000209462	0.000721797	0.281919	1.88017e-05	0.281899	2.30617	0.65806	2.07221
		BY_A1-101	1515	1.46746	0.000259188	0.00124016	0.281924	3.24946e-05	0.281888	2.34821	1.13731	2.08375
		BY_A1-15	1092	1.46732	0.00023208	0.00105867	0.282024	2.84158e-05	0.282003	-3.22518	0.994554	2.09601
		BY_A1-21	2402	1.46728	0.000165005	6.27448e-05	0.281136	1.18064e-05	0.281133	-4.0032	0.413223	3.1589
		BY_A1-34	1618	1.46719	0.00019095	0.000845735	0.281743	1.65451e-05	0.281717	-1.36857	0.57908	2.39022
		BY_A1-39	1154	1.46781	0.000242827	0.00103211	0.282107	3.61603e-05	0.282085	1.09712	1.26561	1.87837
		BY_A1-40	1550	1.46762	0.000327015	0.00135219	0.282045	7.66655e-05	0.282006	7.31502	2.68329	1.80753
		BY_A1-45	1095	1.46715	0.000211752	0.000466747	0.282095	1.66562e-05	0.282085	-0.223459	0.582967	1.91381
		BY_A1-56	1481	1.46716	0.000220604	0.001316	0.28196	1.98538e-05	0.281923	2.80764	0.694884	2.02903
		BY_A1-58	1587	1.4673	0.000192519	0.00128496	0.281789	2.59438e-05	0.28175	-0.912897	0.908034	2.33846
		BY_A1-68	1161	1.46716	0.000141148	0.000574865	0.282102	1.60836e-05	0.28209	1.42438	0.562928	1.86367
		BY_A1-73	1438	1.46739	0.000215704	0.000917781	0.281947	2.24004e-05	0.281922	1.78825	0.784014	2.05765
		BY_A1-77	1589	1.4672	0.000150088	0.000654858	0.281942	1.86163e-05	0.281923	5.26677	0.65157	1.96375
		BY_A1-87	1484	1.4672	0.000178169	0.00116843	0.281914	1.92102e-05	0.281881	1.37144	0.672357	2.11908
		BY_A1-96	1131	1.46722	0.000182034	0.000589573	0.282107	1.90113e-05	0.282094	0.907492	0.665394	1.87214
Kyalla Fm.	E-Ky7	BY E7-106	1690	1.46723	0.000160077	0.000858891	0.281605	1.82565e-05	0.281578	-4.663	0.638979	2.64513
		BY E7-110	1711	1.46728	0.0001762	0.000774829	0.281593	2.31064e-05	0.281568	-4.52118	0.808723	2.65283
		BY E7-114	1698	1.46729	0.000183139	0.00095234	0.281698	2.18859e-05	0.281667	-1.30777	0.766005	2.44884
		BY E7-116	1706	1.46732	0.000160323	0.000699244	0.28167	1.78209e-05	0.281648	-1.81013	0.623731	2.48543
		BY E7-117	1697	1.46732	0.000164566	0.000766974	0.281614	1.88083e-05	0.281589	-4.10674	0.658292	2.61703
		BY E7-119	1704	1.46723	0.000142707	0.000865489	0.28163	1.74375e-05	0.281602	-3.48146	0.610313	2.58476
		BY E7-120	1814	1.4673	0.000139792	0.00093529	0.281602	2.01091e-05	0.28157	-2.09863	0.703818	2.58692
		BY E7-126	1829	1.46732	0.000177386	0.000966061	0.281608	1.83648e-05	0.281575	-1.57469	0.642769	2.56706
		BY E7-21	1714	1.46725	0.000178085	0.000530253	0.281619	1.813e-05	0.281602	-3.24907	0.634549	2.5785
		BY E7-22	1711	1.46725	0.000178085	0.000530253	0.281619	1.813e-05	0.281602	-3.31686	0.634549	2.58026
		BY E7-23	1714	1.46725	0.000163056	0.000526833	0.281685	1.99654e-05	0.281668	-0.917387	0.698789	2.43771
		BY E7-24	1821	1.46726	0.000156498	0.000692283	0.281551	1.94873e-05	0.281527	-3.46059	0.682057	2.67429
		BY E7-26	1818	1.46726	0.000156498	0.000692283	0.281551	1.94873e-05	0.281527	-3.5282	0.682057	2.67603
		BY E7-32	1700	1.46725	0.000162645	0.00075686	0.281624	2.07563e-05	0.2816	-3.64464	0.72647	2.5915
		BY E7-34	2573	1.46725	0.000166659	0.000740061	0.281277	1.88923e-05	0.28124	3.81116	0.661232	2.83086
		BY E7-39	1720	1.46727	0.000136991	0.000559938	0.281591	1.63563e-05	0.281573	-4.14501	0.572472	2.63715
		BY E7-42	1820	1.46727	0.000172941	0.000707843	0.281577	1.85256e-05	0.281553	-2.55429	0.648397	2.61901
		BY E7-49	1830	1.46729	0.000161775	0.00112171	0.281616	1.97642e-05	0.281577	-1.48019	0.691747	2.56215
		BY E7-55	1701	1.46728	0.000147695	0.000873188	0.281621	1.91348e-05	0.281593	-3.88242	0.669718	2.60661
		BY E7-61	1697	1.46729	0.000172718	0.00108762	0.281615	2.16797e-05	0.28158	-4.42077	0.758789	2.63595
		BY E7-66	1700	1.46724	0.000108627	0.0010457	0.281597	2.4059e-05	0.281563	-4.94387	0.842064	2.66978
		BY E7-89	1833	1.46726	0.000149997	0.000874992	0.281541	2.16438e-05	0.281511	-3.74976	0.757533	2.70098
		BY E7-90	1696	1.46729	0.000194866	0.000791624	0.28163	1.85961e-05	0.281604	-3.58427	0.650863	2.58475
		BY E7-96	2264	1.46725	0.000142141	0.000639277	0.281256	1.90704e-05	0.281229	-3.81252	0.667464	3.03998
	J-Ky8	BY J8-01	2521	1.46722	0.00018878	0.000628035	0.28096	1.72744e-05	0.28093	-8.45277	0.604603	3.51327
		BY J8-10	1811	1.46705	0.000318728	0.000408351	0.28152	1.69609e-05	0.281506	-4.43147	0.593632	2.72487
		BY J8-19	1694	1.46718	0.000250102	0.00104825	0.281693	2.63337e-05	0.281659	-1.68492	0.92168	2.46853
		BY J8-20	1745	1.46721	0.000206971	0.000762435	0.281599	2.26719e-05	0.281573	-3.55155	0.793518	2.62078
		BY J8-30	1805	1.4673	0.000182581	0.000580802	0.281532	1.89239e-05	0.281513	-4.33617	0.662338	2.71449
		BY J8-31	2479	1.46729	0.000181712	0.000675085	0.281124	2.05981e-05	0.281092	-3.65544	0.720932	3.1985
		BY J8-33	1804	1.46728	0.000169665	0.000899488	0.28159	1.89417e-05	0.28156	-2.69148	0.66296	2.61482
		BY J8-38	1705	1.46729	0.000198248	0.00117904	0.28158	2.50499e-05	0.281542	-5.5809	0.876745	2.71198
		BY J8-41	1698	1.46722	0.000160409	0.00102759	0.281625	1.89579e-05	0.281592	-3.98864	0.663525	2.61069
		BY J8-47	1695	1.4673	0.000183723	0.000503202	0.281605	1.62423e-05	0.281589	-4.14007	0.56848	2.61749
		BY J8-48	1706	1.46722	0.00022067	0.0013119	0.281636	2.61315e-05	0.281594	-3.72501	0.914604	2.60099
		BY J8-57	1756	1.46718	0.000185159	0.000774132	0.281702	2.52723e-05	0.281677	0.359581	0.884531	2.39331
		BY J8-63	1690	1.46723	0.000147336	0.000807097	0.281788	1.88049e-05	0.281762	1.88496	0.65817	2.24918
		BY J8-67	1699	1.46729	0.000182478	0.00130788	0.281676	2.59141e-05	0.281634	-2.45118	0.906994	2.51871
		BY J8-71	1756	1.46727	0.000209082	0.00116962	0.281618	2.53962e-05	0.281579	-3.09017	0.888868	2.60153
		BY J8-89	1739	1.46733	0.000169162	0.000840667	0.281634	2.12889e-05	0.281607	-2.50774	0.745111	2.55321
	BirC-Ky1	BY_BirC-10	1757	1.46722	0.000185914	0.001593	0.281639	2.55657e-05	0.281586	-2.83744	0.894798	2.58708
		BY_BirC-102	1750	1.46742	0.000180386	0.000924491	0.281718	2.92955e-05	0.281687	0.599291	1.02534	2.37411
		BY_BirC-21	1694	1.46718	0.000155952	0.000426118	0.281621	1.62086e-05	0.281607	-3.52653	0.567302	2.57972
		BY_BirC-23	2491	1.46725	0.000128266	0.000565012	0.281175	1.74661e-05	0.281148	-1.40036	0.611313	3.07472
		BY_BirC-24	1748	1.46727	0.000183632	0.000370132	0.281512	2.25432e-05	0.281499	-6.11084	0.789011	2.77702
		BY_BirC-26	1755	1.46724	0.000179388	0.000928149	0.281738	2.54227e-05	0.281707	1.42113	0.889793	2.32829
		BY_BirC-30	1748	1.46722	0.000158653	0.00170341	0.281678	2.82459e-05	0.281622	-1.75877	0.988606	2.51503
		BY_BirC-38	1777	1.46726	0.000175091	0.00222254	0.28164	3.3316e-05	0.281565	-3.12873	1.16606	2.62016
		BY_BirC-48	1771	1.46722	0.000189428	0.00117036	0.281582	2.4401e-05	0.281543	-4.03303	0.854036	2.66992
		BY_BirC-56	1698	1.4672	0.000191085	0.000964684	0.281665	3.02597e-05	0.281634	-2.49103	1.05909	2.52034
		BY_BirC-61	1748	1.46735	0.000174768	0.000683435	0.281775	2.67884e-05	0.281752	2.86708	0.937594	2.23516
		BY_BirC-62	2480	1.46729	0.000157057	0.000458856	0.28115	2.68199e-05	0.281129	-2.33643	0.938696	3.12141
		BY_BirC-70	1696	1.46728	0.000165339	0.000688009	0.281709	2.11322e-05	0.281687	-0.658894	0.739628	2.40804
		BY_BirC-83	1769	1.4673	0.000189929	0.00126472	0.281755	2.53564e-05	0.281712	1.92301	0.887475	2.30888
		BY_BirC-84	1747	1.4672	0.000171236	0.00109803	0.281739	2.94129e-05	0.281703	1.08758	1.02945	2.34221
		BY_BirC-91	1757	1.46726	0.000230409	0.00106959	0.281705	3.83238e-05	0.281669	0.112012	1.34133	2.40906
Moroak Sst.	E-Mo13	BY_E13-002	1740	1.46727	0.000191797	0.000528069	0.281195	1.77561e-05	0.281177	-17.7283	0.621464	3.46413
		BY_E13-003	1586	1.46727	0.000167982	0.000297963	0.281825	1.35044e-05	0.281817	1.42813	0.472656	2.19544
		BY_E13-004	1562	1.46723	0.000175803	0.000897182	0.281789	2.20938e-05	0.281762	-1.04942	0.773284	2.32727
		BY_E13-024	1720	1.46721	0.000174979	0.000754468	0.281631	2.01272e-05	0.281606	-2.9546	0.704453	2.5654
		BY_E13-026	1728	1.46726	0.000170398	0.00112218	0.281603	2.13873e-05	0.281566	-4.20648	0.748556	2.64704
		BY_E13-036	1837	1.46722	0.00015731	0.00167483	0.281606	2.30554e-05	0.281547	-2.3676	0.806939	2.62101
		BY_E13-044	2398	1.46722	0.00016497	0.000759511	0.281256	2.17407e-05	0.281222	-0.944106	0.760925	2.97466
		BY_E13-055	1550	1.46727	0.000171271	0.000807569	0.281807	2.13618e-05	0.281784	-0.563287	0.747663	2.2884
		BY_E13-063	1581	1.46726	0.000166427	0.000368195	0.281766	1.88894e-05	0.281755	-0.877027	0.661131	2.33161
		BY_E13-066	3159	1.46727	0.000147471	0.00072923	0.280756	2.12024e-05	0.280712	-1.21836	0.742083	3.59053
		BY_E13-069	1561	1.46723	0.000158523	0.0011229	0.281839	2.33628e-05	0.281805	0.461114	0.817699	2.23471
		BY_E13-078	2415	1.46724	0.000133699	0.000564046	0.281066	1.74065e-05	0.28104	-7.02271	0.609228	3.34713
		BY_E13-084	2340	1.46724	0.000144294	0.000211074	0.281188	1.72845e-05	0.281178	-3.83468	0.604958	3.10056
		BY_E13-114	1729	1.46727	0.0001496	0.00065318	0.281634	1.61324e-05	0.281612	-2.54832	0.564633	2.54789
		BY_E13-134	2526	1.46725	0.000172679	0.000974617	0.280963	2.14718e-05	0.280915	-8.84676	0.751513	3.54022
	J-Mo13	BY_J13-002	1728	1.46719	0.000169696	0.00102722	0.281652	2.15209e-05	0.281619	-2.33639	0.75323	2.53432
		BY_J13-007	1733	1.46723	0.000201148	0.000689908	0.281676	2.0993e-05	0.281653	-0.988022	0.734757	2.4568
		BY_J13-014	1738	1.46721	0.000186192	0.00110494	0.28178	2.34793e-05	0.281744	2.34229	0.821776	2.25913
		BY_J13-021	1655	1.46724	0.000144471	0.000729809	0.281668	1.44781e-05	0.281645	-3.06361	0.506732	2.52153
		BY_J13-023	1564	1.46738	0.000137729	0.00118786	0.281731	2.33711e-05	0.281696	-3.36873	0.817989	2.46945
		BY_J13-027	1568	1.46723	0.000151359	0.000589517	0.281622	1.86385e-05	0.281605	-6.49811	0.652347	2.66167
		BY_J13-028	1693	1.4672	0.000154235	0.000547794	0.281587	1.58008e-05	0.281569	-4.89756	0.553029	2.66158
		BY_J13-053	2498	1.46724	0.000184553	0.000860783	0.281106	1.83028e-05	0.281065	-4.17854	0.640597	3.24418
		BY_J13-066	1404	1.46724	0.000161844	0.000515722	0.281578	1.90403e-05	0.281564	-11.6858	0.666412	2.84912
		BY_J13-071	1562	1.46726	0.000146031	0.00104917	0.282044	2.05545e-05	0.282013	7.86314	0.719407	1.78344
		BY_J13-072	1774	1.46728	0.000157227	0.000601378	0.281696	2.16628e-05	0.281676	0.736975	0.758198	2.38458
		BY_J13-075	1575	1.46723	0.000165505	0.00170309	0.281927	2.595e-05	0.281877	3.30527	0.908249	2.07246
		BY_J13-099	1798	1.46725	0.000168697	0.000604566	0.281553	1.66627e-05	0.281532	-3.8039	0.583196	2.67708
		BY_J13-108	1765	1.46727	0.000177766	0.000263811	0.281541	1.53883e-05	0.281532	-4.56149	0.538592	2.69705
		BY_J13-110	1736	1.46727	0.000137978	0.000595514	0.281626	1.86428e-05	0.281607	-2.58317	0.652498	2.55543
		BY_J13-114	1738	1.46732	0.00016204	0.000663294	0.281613	1.73126e-05	0.281592	-3.06973	0.605939	2.58632
Velkerri Fm.	E-Vel18	BY E18-115	1628	1.46729	0.000187192	0.000348277	0.281564	2.13181e-05	0.281553	-6.95961	0.746134	2.73562
		BY E18-122	1611	1.46734	0.000157429	0.00134232	0.281633	2.82396e-05	0.281592	-5.96679	0.988387	2.66273
		BY E18-123	1722	1.46728	0.000267983	0.00170839	0.281653	4.61213e-05	0.281597	-3.2538	1.61425	2.58499
		BY E18-125	2435	1.46726	0.000181858	0.000610784	0.28118	2.51765e-05	0.281151	-2.58062	0.881176	3.10059
		BY E18-126	2340	1.46726	0.000180911	0.00153372	0.281349	3.50562e-05	0.28128	-0.214549	1.22697	2.88577
		BY E18-29	1631	1.4673	0.000197958	0.00124483	0.281805	2.43751e-05	0.281766	0.683304	0.853127	2.27591
		BY E18-39	1684	1.46734	0.000119212	0.000883895	0.281667	2.97643e-05	0.281639	-2.63666	1.04175	2.51825
		BY E18-42	1797	1.46728	0.000163038	0.000756246	0.28158	2.1835e-05	0.281554	-3.05028	0.764225	2.63097
		BY E18-45	1623	1.46728	0.000170997	0.00133455	0.281651	2.97031e-05	0.28161	-5.04704	1.03961	2.61651
		BY E18-47	1686	1.46729	0.000152037	0.00074131	0.281694	2.56195e-05	0.281671	-1.45977	0.896681	2.44869
		BY E18-61	1674	1.46732	0.000180481	0.00045267	0.281604	2.66994e-05	0.28159	-4.59185	0.934477	2.62847
		BY E18-66	1683	1.46725	0.000133483	0.00057105	0.281575	2.57054e-05	0.281557	-5.56596	0.899687	2.6941
		BY E18-71	1800	1.46733	0.0001944	0.000451542	0.281625	2.20002e-05	0.281609	-1.01479	0.770006	2.51069
		BY E18-76	1710	1.46738	0.000126545	0.000636892	0.281614	2.59692e-05	0.281593	-3.64955	0.908922	2.59954
		BY E18-83	1596	1.46757	0.000172224	0.000622983	0.281514	3.15964e-05	0.281495	-9.7609	1.10588	2.87953
		BY E18-87	1806	1.46732	0.000173657	0.000663576	0.281455	2.57791e-05	0.281432	-7.16129	0.902267	2.88471
		BY E18-99	1718	1.46729	0.000162652	0.00054027	0.281611	2.29299e-05	0.281593	-3.47163	0.802546	2.59502
Bessie Creek Sst.	S-BC1	BY_S1-004	3443	1.46723	0.000159647	0.000687489	0.280596	1.73419e-05	0.28055	-0.234129	0.606968	3.73149
		BY_S1-011	1513	1.46728	0.000181147	0.00105323	0.282081	2.49682e-05	0.282051	8.08569	0.873887	1.73088
		BY_S1-046	1759	1.46725	0.000158062	0.000565852	0.281692	1.91483e-05	0.281673	0.319792	0.670192	2.39806
		BY_S1-047	1741	1.46729	0.000166775	0.00068008	0.281628	1.98559e-05	0.281606	-2.48828	0.694956	2.55359
		BY_S1-049	1707	1.46726	0.000169092	0.000816716	0.281633	2.05201e-05	0.281607	-3.24965	0.718203	2.5731
		BY_S1-04s	1695	1.46725	0.00016954	0.00118625	0.281665	2.37533e-05	0.281627	-2.78686	0.831366	2.53586
		BY_S1-052	1838	1.46725	0.000182594	0.0005755	0.281572	1.71821e-05	0.281552	-2.18581	0.601373	2.61085
		BY_S1-057	1845	1.46723	0.000190209	0.000710868	0.28147	2.09839e-05	0.281445	-5.81604	0.734437	2.83422
		BY_S1-058	1699	1.46724	0.000172817	0.000669256	0.281478	1.85817e-05	0.281457	-8.75941	0.650359	2.89826
		BY_S1-091	1651	1.4672	0.000169808	0.000740304	0.281815	2.36058e-05	0.281792	2.05117	0.826202	2.20849
		BY_S1-113	1852	1.46731	0.000153106	0.000679024	0.281474	1.85301e-05	0.28145	-5.47127	0.648553	2.81898
		BY_S1-115	1535	1.46729	0.000178144	0.000940529	0.281746	1.97079e-05	0.281719	-3.19643	0.689777	2.43655
		BY_S1-122	1527	1.46728	0.000160541	0.000660088	0.281621	1.81287e-05	0.281602	-7.54093	0.634503	2.69308
		BY_S1-127	1740	1.46712	0.000268874	0.000585843	0.28156	2.19381e-05	0.28154	-4.84328	0.767833	2.69466
		BY_S1-128	1702	1.4673	0.000197366	0.00076305	0.281628	1.89676e-05	0.281604	-3.4729	0.663866	2.58269
		BY_S1-143	1827	1.46723	0.000159851	0.000547304	0.281493	1.81071e-05	0.281474	-5.20448	0.63375	2.78365
		BY_S1-20s	1688	1.46725	0.000190844	0.000850563	0.28163	2.46395e-05	0.281603	-3.80956	0.862382	2.59214
		BY_S1-22s	1692	1.46724	0.000168889	0.000808308	0.281625	1.96373e-05	0.281599	-3.84731	0.687307	2.59752
		BY_S1_06s	1695	1.46716	0.000217224	0.000589981	0.281533	1.74887e-05	0.281514	-6.82391	0.612106	2.77901
	W-BC1	BY_W1-03	1748	1.46728	0.000154363	0.00139907	0.281655	2.52622e-05	0.281609	-2.23536	0.884176	2.54378
		BY_W1-04	1853	1.46726	0.000172024	0.000629604	0.281458	1.96656e-05	0.281436	-5.95312	0.688297	2.84862
		BY_W1-08	2534	1.46728	0.000162229	0.000376871	0.281029	1.708e-05	0.28101	-5.28363	0.597799	3.33732
		BY_W1-09	1805	1.46727	0.000148348	0.00113577	0.281607	2.20652e-05	0.281568	-2.3783	0.772281	2.59675
		BY_W1-12	1751	1.46725	0.000170279	0.000841865	0.281653	1.99449e-05	0.281625	-1.59119	0.698071	2.50726
		BY_W1-14	2444	1.46724	0.00018493	0.000956732	0.281342	2.31569e-05	0.281297	2.81349	0.810492	2.78778
		BY_W1-19	1741	1.46725	0.00017073	0.000391787	0.281616	1.70186e-05	0.281603	-2.58654	0.595649	2.55952
		BY_W1-26	1860	1.46723	0.00015815	0.00114051	0.281544	2.07417e-05	0.281504	-3.38246	0.725958	2.69989
		BY_W1-27	2493	1.4673	0.000180454	0.000702766	0.281122	2.12262e-05	0.281088	-3.47031	0.742917	3.19852
		BY_W1-35	2454	1.46729	0.000180632	0.000463798	0.281296	1.70062e-05	0.281274	2.23704	0.595217	2.82997
		BY_W1-50	1735	1.46727	0.000177616	0.00142498	0.281585	2.46561e-05	0.281539	-5.02064	0.862963	2.70146
		BY_W1-67	1728	1.4673	0.000107676	0.00192197	0.281655	2.33407e-05	0.281592	-3.2705	0.816924	2.59066
		BY_W1-68	1846	1.4673	0.000165715	0.000429547	0.281486	2.00068e-05	0.281471	-4.85276	0.70024	2.77726
		BY_W1-71	1742	1.46743	0.000299278	0.000517535	0.281632	2.41565e-05	0.281614	-2.16601	0.845476	2.53493
		BY_W1-73	1840	1.46723	0.000166826	0.000451177	0.28157	1.8926e-05	0.281554	-2.04333	0.662411	2.60384
	A-BC13	BY_A13-107	1421	1.46762	0.000234213	0.00172408	0.282015	5.52698e-05	0.281969	3.04701	1.93444	1.96732
		BY_A13-29b	1535	1.46741	0.000198938	0.00109687	0.281957	2.91327e-05	0.281925	4.12314	1.01964	1.99107
		BY_A13-30	1435	1.46743	0.000388502	0.00104973	0.281759	3.88537e-05	0.28173	-5.07806	1.35988	2.47338
		BY_A13-33	1650	1.46712	0.000247639	0.000935082	0.281646	3.40844e-05	0.281617	-4.17902	1.19295	2.585
		BY_A13-49	1454	1.4673	0.000159785	0.00141193	0.282032	3.43262e-05	0.281993	4.66404	1.20142	1.89419
		BY_A13-52	2987	1.46724	0.000153838	0.000623805	0.280794	1.79659e-05	0.280758	-3.61908	0.628805	3.59443
		BY_A13-54	1648	1.46724	0.000164222	0.00126624	0.281698	2.44693e-05	0.281659	-2.74711	0.856425	2.49697
		BY_A13-55	2476	1.4673	0.000153188	0.000987193	0.280999	2.21929e-05	0.280953	-8.68936	0.776751	3.49233
		BY_A13-64	1540	1.46727	0.0001742	0.00138717	0.282031	2.27942e-05	0.281991	6.55306	0.797796	1.84631
		BY_A13-72	1555	1.46771	0.000332846	0.00145397	0.281889	4.48884e-05	0.281846	1.77285	1.57109	2.15018
		BY_A13-78	2255	1.46769	0.000314002	0.000770714	0.281418	2.30273e-05	0.281385	1.53762	0.805956	2.71446
		BY_A13-88	1539	1.46741	0.000157573	0.00100883	0.281941	2.02087e-05	0.281911	3.70823	0.707303	2.01956

## Sheet: PlotDat11
Source sheet	Appendix 1 U-Pb data	2.98	0.221	2	0.188918	1.95452	0.186061	3.26149	0.238958	3.44925	0.236654	3.94239	0.267197	5.05	0.304108	4.03582	0.280506	4.03701	0.257151	3.14036	0.234906	4.90686	0.325567	4.25686	0.270118	4.17686	0.293786	3.6417	0.253453	3.63239	0.25507	3.7976	0.25259	3.91686	0.273591	4.17557	0.290715	4.27236	0.293739	3.56867	0.243459	3.25434	0.240821	3.1276	0.226555	3.52239	0.251879	4.10815	0.270742
Plot name	Concordia11	3.18	0.231	2	0.188918	2.10365	0.195296	3.25524	0.240189	3.44554	0.238587	3.93965	0.268317	5.04196	0.308617	4.03147	0.281892	4.03349	0.259309	3.13808	0.236178	4.90357	0.327342	4.25362	0.271232	4.17358	0.295917	3.63928	0.254599	3.62966	0.255992	3.79509	0.253859	3.9136	0.274795	4.17355	0.291645	4.2701	0.294996	3.56674	0.244258	3.25234	0.241617	3.12508	0.227569	3.51967	0.252725	4.10569	0.271879
Plot Type	1	3.82	0.2608	2.08106	0.193922	2.2603	0.204603	3.23695	0.240581	3.43458	0.240314	3.93168	0.269109	5.01813	0.312861	4.01875	0.282832	4.02305	0.26135	3.13153	0.237144	4.894	0.328757	4.24409	0.272086	4.16402	0.297737	3.63226	0.255448	3.6217	0.256599	3.78778	0.254911	3.90406	0.275676	4.16766	0.292372	4.26356	0.29599	3.56115	0.244792	3.24653	0.24218	3.11775	0.2283	3.51173	0.253311	4.09853	0.272776
1st free col	59	4.23	0.295	2.16431	0.198946	2.42487	0.213982	3.20744	0.240118	3.41668	0.241787	3.91883	0.269537	4.97895	0.316758	3.99822	0.283287	4.00598	0.263217	3.12097	0.237763	4.87858	0.32975	4.2287	0.272644	4.1486	0.299167	3.62094	0.255963	3.60886	0.256866	3.77597	0.2557	3.88866	0.276195	4.15815	0.292864	4.25301	0.296679	3.55215	0.245038	3.23715	0.242487	3.10594	0.228716	3.4989	0.253614	4.08697	0.273394
Sigma Level	2	3.84	0.2717	2.24981	0.203992	2.59774	0.223435	3.16798	0.238819	3.39232	0.242966	3.90166	0.269584	4.9252	0.320231	3.97078	0.283234	3.98275	0.26486	3.10687	0.238008	4.85797	0.330277	4.20813	0.27288	4.128	0.300143	3.60583	0.256122	3.5917	0.25678	3.76018	0.256192	3.86807	0.27633	4.14545	0.293099	4.23892	0.297032	3.54012	0.244985	3.22462	0.242523	3.09015	0.2288	3.48175	0.253618	4.07153	0.273706
Absolute Errs	TRUE	3.78	0.255	2.33762	0.209058	2.77933	0.232961	3.12031	0.236741	3.36217	0.243818	3.88092	0.269247	4.85792	0.323212	3.93761	0.282678	3.95399	0.266234	3.08985	0.237868	4.83308	0.330316	4.18327	0.272786	4.10312	0.300623	3.58757	0.255916	3.57097	0.256345	3.74111	0.256365	3.8432	0.276074	4.13011	0.293069	4.22191	0.297034	3.5256	0.244636	3.20948	0.242287	3.07107	0.228546	3.46103	0.253325	4.05287	0.2737
Symbol Type	1	3.04	0.2292	2.42781	0.214147	2.97009	0.242562	3.06651	0.233976	3.32705	0.244321	3.85752	0.268541	4.77841	0.325645	3.90019	0.281642	3.92048	0.267302	3.07065	0.237349	4.805	0.329865	4.1552	0.272364	4.07504	0.300587	3.56698	0.255356	3.54757	0.25558	3.71959	0.256213	3.81513	0.27544	4.1128	0.292773	4.20272	0.296686	3.50922	0.244005	3.1924	0.24179	3.04954	0.227968	3.43764	0.252746	4.03182	0.273374
Inverse Plot	FALSE	4.76	0.3191	2.52043	0.219256	3.17049	0.252237	3.00893	0.230643	3.28792	0.24446	3.83248	0.267496	4.68823	0.327481	3.86013	0.280171	3.88314	0.268034	3.05011	0.236474	4.77495	0.328943	4.12516	0.271634	4.04499	0.300036	3.54494	0.254466	3.52253	0.25452	3.69656	0.25574	3.78508	0.274454	4.09427	0.292224	4.18218	0.296001	3.49169	0.243121	3.17412	0.241053	3.02651	0.227089	3.4126	0.251908	4.00928	0.272743
Color Plot	TRUE	4.11	0.2653	2.61555	0.224387	3.38099	0.261987	2.95008	0.226889	3.24585	0.244232	3.80689	0.266159	4.58913	0.328685	3.81919	0.27833	3.84299	0.268411	3.02913	0.235281	4.74424	0.327591	4.09446	0.270626	4.01428	0.298993	3.52242	0.253284	3.49695	0.253209	3.67302	0.254969	3.75438	0.273159	4.07533	0.291448	4.1612	0.29501	3.47378	0.242021	3.15544	0.240108	3.00297	0.225949	3.38702	0.250846	3.98625	0.271835
3D plot	FALSE	4.03	0.2888	2.71324	0.22954	3.60212	0.271813	2.89254	0.222877	3.20198	0.243643	3.78188	0.264587	4.48304	0.329234	3.77916	0.2762	3.80111	0.268422	3.00862	0.233823	4.71423	0.325868	4.06443	0.269386	3.98427	0.297506	3.50041	0.251862	3.47193	0.251705	3.65	0.253932	3.72436	0.271613	4.05682	0.290477	4.14069	0.293757	3.45627	0.240755	3.13718	0.238996	2.97995	0.224596	3.362	0.249607	3.96374	0.27069
Linear	FALSE	3.534	0.2478	2.81358	0.234714	3.83441	0.281716	2.83882	0.218783	3.15751	0.242709	3.75853	0.26285	4.37203	0.329116	3.74179	0.273872	3.75867	0.268067	2.98949	0.232162	4.68622	0.323849	4.0364	0.267968	3.95625	0.295637	3.47987	0.250264	3.44858	0.250075	3.62852	0.252676	3.69633	0.269883	4.03954	0.289354	4.12155	0.292295	3.43993	0.239377	3.12014	0.237767	2.95847	0.223091	3.33864	0.248246	3.94272	0.269357
Data Range	D182:H206	3.51	0.2488	2.91662	0.23991	4.07843	0.291696	2.79128	0.214787	3.11365	0.241456	3.73787	0.261024	4.25825	0.328334	3.70872	0.27145	3.7168	0.267355	2.97256	0.230372	4.66143	0.321622	4.01159	0.266432	3.93146	0.29347	3.4617	0.248557	3.42791	0.248388	3.6095	0.251254	3.67153	0.268045	4.02425	0.288128	4.10462	0.29069	3.42547	0.237947	3.10506	0.236473	2.93946	0.221499	3.31797	0.246822	3.92412	0.267895
Filled Symbols	FALSE	3.685	0.2489	3.02245	0.245128	4.33477	0.301754	2.75198	0.211062	3.07161	0.239918	3.7208	0.259187	4.14392	0.326903	3.68138	0.269039	3.67666	0.266306	2.95859	0.22853	4.64095	0.319286	3.99107	0.264848	3.91097	0.291099	3.44668	0.246817	3.41083	0.24672	3.59378	0.24973	3.65102	0.266178	4.01161	0.286853	4.09063	0.289011	3.41353	0.236529	3.09259	0.235172	2.92375	0.219889	3.30087	0.245396	3.90875	0.266368
ConcAge	FALSE	3.77	0.2674	3.13114	0.250368	4.60404	0.31189	2.72264	0.207771	3.03252	0.238136	3.70807	0.257421	4.03127	0.324851	3.66097	0.266744	3.63933	0.264949	2.94816	0.226718	4.62567	0.316941	3.97575	0.263283	3.89568	0.288627	3.43548	0.245121	3.39809	0.245143	3.58205	0.248169	3.63572	0.264365	4.00218	0.285584	4.08019	0.287331	3.40463	0.235183	3.08329	0.23392	2.91203	0.218332	3.28812	0.244032	3.89728	0.264842
ConcSwap	FALSE	4.085	0.287	3.24276	0.25563	4.8869	0.322105	2.70456	0.205058	2.99745	0.23616	3.70022	0.255803	3.92248	0.322218	3.64839	0.264665	3.60585	0.263321	2.94176	0.225014	4.61626	0.314691	3.9663	0.261806	3.88627	0.286163	3.42859	0.243541	3.39023	0.243725	3.57482	0.24664	3.62629	0.262684	3.99637	0.284377	4.07377	0.285724	3.39915	0.23397	3.07756	0.232773	2.90481	0.216897	3.28025	0.242789	3.89021	0.263384
1st Symbol-row	1	4.172	0.289	3.3574	0.260914	5.18404	0.332399	2.69851	0.203042	2.96736	0.234043	3.69761	0.254403	3.81968	0.319056	3.64418	0.262894	3.57711	0.261465	2.93964	0.223494	4.61314	0.312633	3.96314	0.260482	3.88314	0.283814	3.4263	0.242147	3.38761	0.24253	3.5724	0.24521	3.62314	0.261209	3.99443	0.283285	4.07164	0.284261	3.39733	0.232941	3.07566	0.231779	2.9024	0.215645	3.27761	0.241721	3.88785	0.262058
		3.483	0.2382	3.47514	0.266221	5.49618	0.342774	2.70476	0.201811	2.94308	0.231843	3.70035	0.253283	3.72487	0.315425	3.64853	0.261508	3.55391	0.259433	2.94192	0.222222	4.61643	0.310858	3.96638	0.259368	3.88642	0.281683	3.42872	0.241001	3.39034	0.241608	3.57491	0.243941	3.6264	0.260005	3.99645	0.282355	4.0739	0.283004	3.39926	0.232142	3.07766	0.230983	2.90492	0.214631	3.28033	0.240875	3.89031	0.260921
		3.165	0.2363	3.59606	0.271549	IsoLine	IsoLine	2.72305	0.201419	2.92525	0.22962	3.70832	0.252491	3.63989	0.311397	3.66125	0.260568	3.53688	0.257281	2.94847	0.221256	4.626	0.309443	3.97591	0.258514	3.89598	0.279863	3.43574	0.240152	3.3983	0.241001	3.58222	0.242889	3.63594	0.259124	4.00234	0.281628	4.08044	0.28201	3.40485	0.231608	3.08347	0.23042	2.91225	0.2139	3.28827	0.240289	3.89747	0.260024
		3.015	0.2211	3.72025	0.276901			2.75256	0.201882	2.91438	0.227435	3.72117	0.252063	3.56639	0.307049	3.68178	0.260113	3.52647	0.255066	2.95903	0.220637	4.64142	0.30845	3.9913	0.257956	3.9114	0.278433	3.44706	0.239637	3.41114	0.240734	3.59403	0.2421	3.65134	0.258605	4.01185	0.281136	4.09099	0.281321	3.41385	0.231362	3.09285	0.230113	2.92406	0.213484	3.3011	0.239986	3.90903	0.259406
		3.4	0.2468	3.84779	0.282274			2.79202	0.203181	2.91075	0.225346	3.73834	0.252016	3.50582	0.302467	3.70922	0.260166	3.52299	0.252849	2.97313	0.220392	4.66203	0.307923	4.01187	0.25772	3.932	0.277457	3.46217	0.239478	3.4283	0.24082	3.60982	0.241608	3.67193	0.25847	4.02455	0.280901	4.10508	0.280968	3.42588	0.231415	3.10538	0.230077	2.93985	0.2134	3.31825	0.239982	3.92447	0.259094
		3.998	0.2664	3.97878	0.28767			2.83969	0.205259	2.91446	0.223413	3.75908	0.252353	3.45933	0.29774	3.74239	0.260722	3.52651	0.250691	2.99015	0.220532	4.68692	0.307884	4.03673	0.257814	3.95688	0.276977	3.48043	0.239684	3.44903	0.241255	3.62889	0.241435	3.6968	0.258726	4.03989	0.280931	4.12209	0.280966	3.4404	0.231764	3.12052	0.230313	2.95893	0.213654	3.33897	0.240275	3.94313	0.2591
		3.09	0.2284	4.11331	0.293089			2.89349	0.208024	2.92542	0.221686	3.78248	0.253059	3.42785	0.292959	3.77981	0.261758	3.53695	0.24865	3.00935	0.221051	4.715	0.308335	4.0648	0.258236	3.98496	0.277013	3.50102	0.240244	3.47243	0.24202	3.65041	0.241587	3.72487	0.25936	4.0572	0.281227	4.14128	0.281314	3.45678	0.232395	3.1376	0.23081	2.98046	0.214232	3.36236	0.240854	3.96418	0.259426
		3.589	0.2563	4.25147	0.298531			2.95107	0.211357	2.94332	0.220213	3.80752	0.254104	3.41198	0.288218	3.81987	0.263229	3.55402	0.246783	3.02989	0.221926	4.74505	0.309257	4.09484	0.258966	4.01501	0.277564	3.52306	0.241134	3.49747	0.24308	3.67344	0.24206	3.75492	0.260346	4.07573	0.281776	4.16182	0.281999	3.47431	0.233279	3.15588	0.231547	3.00349	0.215111	3.3874	0.241692	3.98672	0.260057
		3.98	0.2634	4.39337	0.303996			3.00992	0.215111	2.96768	0.219034	3.83311	0.255441	3.41203	0.283609	3.86081	0.26507	3.57725	0.24514	3.05087	0.223119	4.77576	0.310609	4.12554	0.259974	4.04572	0.278607	3.54558	0.242316	3.52305	0.244391	3.69698	0.242831	3.78562	0.261641	4.09467	0.282552	4.1828	0.28299	3.49222	0.234379	3.17456	0.232492	3.02703	0.216251	3.41298	0.242754	4.00975	0.260965
		4	0.2564	4.5391	0.309484			3.06746	0.219123	2.99783	0.218182	3.85812	0.257013	3.428	0.279222	3.90084	0.2672	3.60601	0.243766	3.07138	0.224577	4.80577	0.312332	4.15557	0.261214	4.07573	0.280094	3.56759	0.243738	3.54807	0.245895	3.72	0.243868	3.81564	0.263187	4.11318	0.283523	4.20331	0.284243	3.50973	0.235645	3.19282	0.233604	3.05005	0.217604	3.438	0.243993	4.03226	0.26211
		IsoLine	IsoLine	4.68877	0.314994			3.12118	0.223217	3.03295	0.217679	3.88147	0.25875	3.45958	0.275142	3.93821	0.269528	3.63952	0.242698	3.09051	0.226238	4.83378	0.314351	4.1836	0.262632	4.10375	0.281963	3.58813	0.245336	3.57142	0.247525	3.74148	0.245124	3.84367	0.264917	4.13046	0.284646	4.22245	0.285705	3.52607	0.237023	3.20986	0.234833	3.07153	0.219109	3.46136	0.245354	4.05328	0.263443
				4.84248	0.320528			3.16872	0.227213	3.07208	0.21754	3.90213	0.260576	3.50616	0.271448	3.97128	0.27195	3.67686	0.241966	3.10744	0.228028	4.85857	0.316578	4.20841	0.264168	4.12854	0.28413	3.6063	0.247043	3.59209	0.249212	3.7605	0.246546	3.86847	0.266755	4.14575	0.285872	4.23938	0.28731	3.54053	0.238453	3.22494	0.236127	3.09054	0.220701	3.48203	0.246778	4.07188	0.264905
				5.00035	0.326086			3.20802	0.230938	3.11415	0.217768	3.9192	0.262413	3.56683	0.268213	3.99862	0.274361	3.71701	0.241589	3.12141	0.22987	4.87905	0.318914	4.22893	0.265752	4.14903	0.286501	3.62132	0.248783	3.60917	0.25088	3.77622	0.24807	3.88898	0.268622	4.15839	0.287147	4.25337	0.288989	3.55247	0.239871	3.23741	0.237428	3.10625	0.222311	3.49913	0.248204	4.08725	0.266432
				5.16248	0.331666			3.23736	0.234229	3.15802	0.218357	3.93193	0.264179	3.6404	0.265499	4.01903	0.276656	3.75889	0.241578	3.13184	0.231682	4.89433	0.321259	4.24425	0.267317	4.16432	0.288973	3.63252	0.250479	3.62191	0.252457	3.78795	0.249631	3.90428	0.270435	4.16782	0.288416	4.26381	0.290669	3.56137	0.241217	3.24671	0.23868	3.11797	0.223868	3.51188	0.249568	4.09872	0.267958
				5.32899	0.33727			3.25544	0.236942	3.20249	0.219291	3.93978	0.265797	3.72545	0.26336	4.03161	0.278735	3.80133	0.241933	3.13824	0.233386	4.90374	0.323509	4.2537	0.268794	4.17373	0.291437	3.63941	0.252059	3.62977	0.253875	3.79518	0.25116	3.91371	0.272116	4.17363	0.289623	4.27023	0.292276	3.56685	0.24243	3.25244	0.239827	3.12519	0.225303	3.51975	0.250811	4.10579	0.269416
				5.5	0.342898			3.26149	0.238958	3.24635	0.220544	3.94239	0.267197	3.82032	0.261836	4.03582	0.280506	3.8432	0.242645	3.14036	0.234906	4.90686	0.325567	4.25686	0.270118	4.17686	0.293786	3.6417	0.253453	3.63239	0.25507	3.7976	0.25259	3.91686	0.273591	4.17557	0.290715	4.27236	0.293739	3.56867	0.243459	3.25434	0.240821	3.1276	0.226555	3.52239	0.251879	4.10815	0.270742
				5.5	0.342898					3.28839	0.222082			3.92316	0.260958			3.88334	0.243694
				IsoLine	IsoLine					3.32748	0.223864			4.03198	0.260742			3.92067	0.245051
										3.36255	0.22584			4.14465	0.261193			3.95415	0.246679
										3.39264	0.227957			4.25898	0.262302			3.98289	0.248535
										3.41692	0.230157			4.37275	0.264048			4.00609	0.250567
										3.43475	0.23238			4.48374	0.266396			4.02312	0.252719
										3.44562	0.234565			4.58979	0.2693			4.03353	0.254934
										3.44925	0.236654			4.68884	0.272705			4.03701	0.257151
														4.77896	0.276544
														4.85839	0.280742
														4.92559	0.285218
														4.97925	0.289884
														5.01833	0.29465
														5.04207	0.299422
														5.05	0.304108
[truncated: 8 more columns]

## Sheet: PlotDat18
Source sheet	Appendix 1 U-Pb data	4.711	0.3073	2.6	0.223556	2.59774	0.223435	4.8236	0.311961	4.55806	0.292647	4.16463	0.289278	3.42463	0.249083	3.8086	0.256023	4.31806	0.285309	4.20882	0.270426	4.30806	0.277892	4.09781	0.26672	5.10463	0.317116	4.93982	0.310519	4.24463	0.29449	3.79381	0.270661	4.26686	0.287173	4.46203	0.302099	4.71981	0.303979	4.59134	0.294124	4.42916	0.299034	4.29346	0.292077	4.38686	0.278638	3.73463	0.268707
Plot name	Concordia18	4.35	0.283	2.6	0.223556	2.77933	0.232961	4.82109	0.312972	4.55515	0.294061	4.16162	0.290724	3.42165	0.249994	3.80611	0.256743	4.31518	0.286604	4.2063	0.271267	4.30515	0.27958	4.09553	0.267829	5.10162	0.318412	4.93727	0.311686	4.24164	0.295628	3.7915	0.271635	4.26362	0.288633	4.45971	0.303062	4.71752	0.305038	4.58897	0.295269	4.42647	0.300356	4.29131	0.293121	4.38361	0.279643	3.73165	0.27001
Plot Type	1	4.03	0.284	2.67236	0.227398	2.97009	0.242562	4.81377	0.313735	4.54664	0.295174	4.15287	0.291876	3.41292	0.25067	3.7988	0.257246	4.3067	0.287681	4.19891	0.271882	4.29665	0.281006	4.08886	0.26877	5.09286	0.319394	4.92985	0.312552	4.2329	0.296511	3.78481	0.27234	4.25409	0.289864	4.45295	0.303791	4.71083	0.305881	4.58198	0.296235	4.4186	0.301449	4.28508	0.293881	4.37409	0.28037	3.72292	0.271117
1st free col	89	3.29	0.2446	2.74618	0.231251	3.17049	0.252237	4.80196	0.314218	4.53277	0.295954	4.13874	0.292684	3.39882	0.251081	3.78701	0.257512	4.29285	0.28851	4.18698	0.272244	4.28278	0.282132	4.07808	0.269503	5.07874	0.320017	4.9179	0.313079	4.21879	0.2971	3.77402	0.272746	4.2387	0.290812	4.44203	0.304254	4.70005	0.306472	4.57058	0.296995	4.40589	0.302264	4.27504	0.294322	4.3587	0.280789	3.70882	0.271977
Sigma Level	2	3.696	0.2518	2.82149	0.235117	3.38099	0.261987	4.78618	0.314397	4.51392	0.296381	4.11986	0.293113	3.37996	0.251208	3.77123	0.257528	4.27402	0.289069	4.17103	0.272338	4.26393	0.282927	4.06368	0.269995	5.05986	0.320255	4.90193	0.313244	4.19993	0.297371	3.7596	0.272835	4.21813	0.291437	4.42745	0.30443	4.68564	0.306784	4.55507	0.297529	4.38891	0.302766	4.26164	0.294426	4.33813	0.28088	3.68997	0.272555
Absolute Errs	TRUE	4.11	0.2786	2.8983	0.238995	3.60212	0.271813	4.76711	0.314267	4.49059	0.296442	4.09706	0.293143	3.35717	0.251047	3.75217	0.257294	4.25071	0.289343	4.15176	0.27216	4.24061	0.28337	4.04627	0.270225	5.03705	0.320097	4.88264	0.31304	4.17713	0.297311	3.74218	0.272604	4.19327	0.291711	4.40983	0.304312	4.66822	0.306804	4.53587	0.297822	4.36839	0.302933	4.24545	0.294188	4.31326	0.280639	3.66718	0.272824
Symbol Type	1	4.095	0.2661	2.97666	0.242885	3.83441	0.281716	4.74558	0.313832	4.46343	0.296138	4.07132	0.292773	3.33145	0.250604	3.73065	0.25682	4.22357	0.289323	4.13001	0.271716	4.21345	0.283447	4.02663	0.270183	5.01132	0.31955	4.86088	0.312476	4.1514	0.296922	3.72252	0.272063	4.1652	0.291621	4.38994	0.303905	4.64857	0.306531	4.51352	0.297866	4.34523	0.302757	4.22719	0.293618	4.2852	0.280078	3.64145	0.272774
Inverse Plot	FALSE	4.1	0.27	3.0566	0.246787	4.07843	0.291696	4.72255	0.313112	4.43318	0.295474	4.04378	0.292021	3.30391	0.249898	3.70762	0.256126	4.19333	0.289011	4.10673	0.271027	4.1832	0.283158	4.0056	0.269871	4.98377	0.318638	4.83759	0.311577	4.12387	0.296223	3.70149	0.271234	4.13516	0.291172	4.36866	0.303227	4.62754	0.305977	4.48861	0.29766	4.32045	0.302247	4.20766	0.292742	4.25516	0.279221	3.61392	0.272405
Color Plot	TRUE	3.995	0.264	3.13814	0.250702	4.33477	0.301754	4.69901	0.312138	4.40065	0.294471	4.01563	0.290917	3.27577	0.248961	3.68408	0.255243	4.16081	0.288414	4.08293	0.270123	4.15067	0.28251	3.98411	0.269303	4.95563	0.317401	4.81379	0.310381	4.09572	0.295242	3.67999	0.270155	4.10446	0.290383	4.34691	0.302308	4.60605	0.305166	4.46183	0.29721	4.29512	0.301425	4.1877	0.291597	4.22445	0.278105	3.58577	0.271734
3D plot	FALSE	4.97	0.3112	3.22132	0.254629	4.60404	0.31189	4.676	0.310952	4.36675	0.293155	3.98812	0.289512	3.24824	0.247834	3.66107	0.25421	4.12691	0.28755	4.05967	0.269043	4.11677	0.281521	3.96309	0.268502	4.92811	0.315894	4.79053	0.308942	4.0682	0.294024	3.65898	0.268873	4.07444	0.289289	4.32565	0.301187	4.58503	0.304133	4.43392	0.296528	4.27035	0.300326	4.1682	0.290233	4.19443	0.276779	3.55825	0.270792
Linear	FALSE	4.826	0.3048	3.30618	0.258568	4.8869	0.322105	4.65451	0.309607	4.33238	0.291561	3.96243	0.287865	3.22255	0.246565	3.63958	0.253071	4.09255	0.286442	4.03794	0.267834	4.08241	0.280218	3.94347	0.267505	4.90243	0.314181	4.76882	0.307321	4.04251	0.292621	3.63937	0.267443	4.0464	0.287938	4.3058	0.299913	4.56542	0.302925	4.40562	0.295632	4.24723	0.298999	4.14999	0.288711	4.1664	0.275301	3.53255	0.269617
Data Range	O2:S41	4.11	0.2898	3.39273	0.262519	5.18404	0.332399	4.63549	0.30816	4.2985	0.289734	3.9397	0.28605	3.1998	0.24521	3.62055	0.251877	4.05866	0.28512	4.01871	0.26655	4.04852	0.278636	3.9261	0.266354	4.87969	0.312338	4.74961	0.30559	4.01976	0.291095	3.62202	0.265928	4.02159	0.286388	4.28823	0.298543	4.54806	0.301593	4.37771	0.294547	4.22676	0.297501	4.13388	0.287097	4.14158	0.273735	3.5098	0.268263
Filled Symbols	FALSE	3.691	0.2655	3.48103	0.266483	IsoLine	IsoLine	4.61978	0.306677	4.26603	0.287724	3.92091	0.284145	3.18099	0.243828	3.60482	0.25068	4.02618	0.28362	4.00282	0.265245	4.01605	0.276818	3.91174	0.265101	4.86091	0.310445	4.73373	0.303825	4.00096	0.289512	3.60767	0.264395	4.00107	0.284708	4.27371	0.297136	4.53371	0.300195	4.35096	0.293303	4.20985	0.295898	4.12058	0.285461	4.12107	0.272151	3.49099	0.266788
ConcAge	FALSE	4.12	0.2834	3.57111	0.27046			4.60805	0.30522	4.23584	0.285584	3.90689	0.282233	3.16695	0.24248	3.59308	0.249531	3.99598	0.281984	3.99095	0.263979	3.98586	0.274814	3.90102	0.2638	4.84689	0.308585	4.72189	0.302102	3.98693	0.287942	3.59698	0.262909	3.98575	0.282971	4.26288	0.295754	4.523	0.298794	4.32609	0.291933	4.19722	0.294261	4.11066	0.283875	4.10575	0.270616	3.47695	0.265257
ConcSwap	FALSE	4.358	0.2977	3.66299	0.274448			4.60082	0.303854	4.20877	0.283374	3.89825	0.280399	3.15828	0.241225	3.58583	0.248482	3.96889	0.280255	3.98363	0.262804	3.95878	0.272679	3.89441	0.262507	4.83825	0.306839	4.7146	0.300498	3.97827	0.286453	3.59039	0.261537	3.97631	0.281252	4.2562	0.294457	4.5164	0.297449	4.30378	0.290474	4.18944	0.29266	4.10456	0.282407	4.0963	0.269199	3.46828	0.263736
1st Symbol-row	1	4.617	0.3001	3.75672	0.27845			4.5984	0.302639	4.18555	0.281154	3.89537	0.278722	3.15537	0.240117	3.5834	0.247577	3.94565	0.27848	3.98118	0.261774	3.93556	0.270471	3.89219	0.26128	4.83537	0.305284	4.71218	0.299081	3.97537	0.28511	3.58819	0.260339	3.97314	0.279627	4.25397	0.293301	4.51419	0.296221	4.28464	0.288968	4.18684	0.291166	4.10254	0.281123	4.09314	0.267962	3.46537	0.262293
		4.42	0.2887	3.85234	0.282464			4.60091	0.301628	4.16681	0.278985	3.89838	0.277276	3.15835	0.239206	3.58589	0.246857	3.92689	0.276709	3.9837	0.260933	3.91682	0.26825	3.89447	0.260171	4.83838	0.303988	4.71473	0.297914	3.97836	0.283972	3.5905	0.259365	3.97638	0.278167	4.25629	0.292338	4.51648	0.295162	4.2692	0.287454	4.18953	0.289844	4.10469	0.280079	4.09639	0.266957	3.46835	0.26099
		4.308	0.2951	3.94988	0.28649			4.60823	0.300865	4.15307	0.276924	3.90713	0.276124	3.16708	0.23853	3.5932	0.246354	3.91313	0.27499	3.99109	0.260318	3.90308	0.266077	3.90114	0.25923	4.84714	0.303006	4.72215	0.297048	3.9871	0.283089	3.59719	0.25866	3.98591	0.276936	4.26305	0.291609	4.52317	0.294319	4.25787	0.285974	4.1974	0.288751	4.11092	0.279319	4.10591	0.26623	3.47708	0.259883
		4.198	0.2866	4.04938	0.290529			4.62004	0.300382	4.14471	0.27503	3.92126	0.275316	3.18118	0.238119	3.60499	0.246088	3.90473	0.273369	4.00302	0.259956	3.89471	0.264011	3.91192	0.258497	4.86126	0.302383	4.7341	0.296521	4.00121	0.2825	3.60798	0.258254	4.0013	0.275988	4.27397	0.291146	4.53395	0.293728	4.25096	0.284569	4.21011	0.287936	4.12096	0.278878	4.1213	0.265811	3.49118	0.259023
		4.24	0.2733	4.15087	0.294581			4.63582	0.300203	4.14194	0.273353	3.94014	0.274887	3.20004	0.237992	3.62077	0.246072	3.90194	0.271891	4.01897	0.259862	3.89194	0.262108	3.92632	0.258005	4.88014	0.302145	4.75007	0.296356	4.02007	0.282229	3.6224	0.258165	4.02187	0.275363	4.28855	0.29097	4.54836	0.293416	4.24866	0.283276	4.22709	0.287434	4.13436	0.278774	4.14187	0.26572	3.51003	0.258445
		3.6	0.2655	4.25441	0.298646			4.65489	0.300333	4.14485	0.271939	3.96294	0.274857	3.22283	0.238153	3.63983	0.246306	3.90482	0.270596	4.03824	0.26004	3.89485	0.26042	3.94373	0.257775	4.90295	0.302303	4.76936	0.29656	4.04287	0.282289	3.63982	0.258396	4.04673	0.275089	4.30617	0.291088	4.56578	0.293396	4.25103	0.282131	4.24761	0.287267	4.15055	0.279012	4.16674	0.265961	3.53282	0.258176
		4.17	0.281	4.36003	0.302723			4.67642	0.300768	4.15336	0.270826	3.98868	0.275227	3.24855	0.238596	3.66135	0.24678	3.9133	0.269519	4.05999	0.260484	3.90335	0.258994	3.96337	0.257817	4.92868	0.30285	4.79112	0.297124	4.0686	0.282678	3.65948	0.258937	4.0748	0.275179	4.32606	0.291495	4.58543	0.293669	4.25802	0.281165	4.27077	0.287443	4.16881	0.279582	4.1948	0.266522	3.55855	0.258226
		4.3	0.2823	4.46778	0.306813			4.69945	0.301488	4.16723	0.270046	4.01622	0.275979	3.27609	0.239302	3.68438	0.247474	3.92715	0.26869	4.08327	0.261173	3.91722	0.257868	3.9844	0.258129	4.95623	0.303762	4.81441	0.298023	4.09613	0.283377	3.68051	0.259766	4.10484	0.275628	4.34734	0.292173	4.60646	0.294223	4.26942	0.280405	4.29555	0.287953	4.18834	0.280458	4.22484	0.267379	3.58608	0.258595
		4.149	0.2646	4.57768	0.310916			4.72299	0.302462	4.18608	0.269619	4.04437	0.277083	3.30423	0.240239	3.70792	0.248357	3.94598	0.268131	4.10707	0.262077	3.93607	0.257073	4.00589	0.258697	4.98437	0.304999	4.83821	0.299219	4.12428	0.284358	3.70201	0.260845	4.13554	0.276417	4.36909	0.293092	4.62795	0.295034	4.28493	0.279871	4.32088	0.288775	4.2083	0.281603	4.25555	0.268495	3.61423	0.259266
		3.982	0.2774	4.6898	0.315032			4.746	0.303648	4.20941	0.269558	4.07188	0.278488	3.33176	0.241366	3.73093	0.24939	3.96929	0.267857	4.13033	0.263157	3.95939	0.25663	4.02691	0.259498	5.01189	0.306506	4.86147	0.300658	4.1518	0.285576	3.72302	0.262127	4.16556	0.277511	4.39035	0.294213	4.64897	0.296067	4.30413	0.279578	4.34565	0.289874	4.2278	0.282967	4.28557	0.269821	3.64175	0.260208
		3.304	0.2422	4.80417	0.319161			4.76749	0.304993	4.23657	0.269862	4.09757	0.280135	3.35745	0.242635	3.75242	0.250529	3.99643	0.267877	4.15206	0.264366	3.98655	0.256553	4.04653	0.260495	5.03757	0.308219	4.88318	0.302279	4.17749	0.286979	3.74263	0.263557	4.1936	0.278862	4.4102	0.295487	4.66858	0.297275	4.32648	0.279534	4.36877	0.291201	4.24601	0.284489	4.3136	0.271299	3.66745	0.261383
		4.16	0.2797	4.92085	0.323303			4.78651	0.30644	4.26682	0.270526	4.1203	0.28195	3.3802	0.24399	3.77145	0.251723	4.02667	0.268189	4.17129	0.26565	4.0168	0.256842	4.0639	0.261646	5.06031	0.310062	4.90239	0.30401	4.20024	0.288505	3.75998	0.265072	4.21841	0.280412	4.42777	0.296857	4.68594	0.298607	4.35139	0.27974	4.38924	0.292699	4.26212	0.286103	4.33842	0.272865	3.6902	0.262737
		4.35	0.2783	5.03986	0.327457			4.80222	0.307923	4.29935	0.271529	4.13909	0.283855	3.39901	0.245372	3.78718	0.25292	4.05919	0.268786	4.18718	0.266955	4.04933	0.25749	4.07826	0.262899	5.07909	0.311955	4.91827	0.305775	4.21904	0.290088	3.77433	0.266605	4.23893	0.282092	4.44229	0.298264	4.70029	0.300005	4.37817	0.28019	4.40615	0.294302	4.27542	0.287739	4.35893	0.274449	3.70901	0.264212
		4.63	0.3033	5.16127	0.331625			4.81395	0.30938	4.33325	0.272845	4.15311	0.285767	3.41305	0.24672	3.79892	0.254069	4.09309	0.26965	4.19905	0.268221	4.08323	0.258479	4.08898	0.2642	5.09311	0.313815	4.93011	0.307498	4.23307	0.291658	3.78502	0.268091	4.25425	0.283829	4.45312	0.299646	4.711	0.301406	4.40608	0.280872	4.41878	0.295939	4.28534	0.289325	4.37425	0.275984	3.72305	0.265743
		4.41	0.2955	5.28512	0.335806			4.82118	0.310746	4.36762	0.274439	4.16175	0.287601	3.42172	0.247975	3.80617	0.255118	4.12745	0.270758	4.20637	0.269396	4.11759	0.259782	4.09559	0.265493	5.10175	0.315561	4.9374	0.309102	4.24173	0.293147	3.79161	0.269463	4.26369	0.285548	4.4598	0.300943	4.7176	0.302751	4.43438	0.281768	4.42656	0.29754	4.29144	0.290793	4.3837	0.277401	3.73172	0.267264
		4.29	0.2889	5.41146	0.34			4.8236	0.311961	4.4015	0.276266	4.16463	0.289278	3.42463	0.249083	3.8086	0.256023	4.16134	0.27208	4.20882	0.270426	4.15148	0.261364	4.09781	0.26672	5.10463	0.317116	4.93982	0.310519	4.24463	0.29449	3.79381	0.270661	4.26686	0.287173	4.46203	0.302099	4.71981	0.303979	4.46229	0.282853	4.42916	0.299034	4.29346	0.292077	4.38686	0.278638	3.73463	0.268707
		4.4	0.2918	5.41146	0.34					4.43397	0.278276							4.19382	0.27358			4.18395	0.263182																	4.48904	0.284097
		4.31	0.2889	IsoLine	IsoLine					4.46416	0.280416							4.22402	0.275216			4.21414	0.265186																	4.51391	0.285467
		3.277	0.2463							4.49123	0.282626							4.25111	0.276945			4.24122	0.267321																	4.53622	0.286926
		3.92	0.2624							4.51445	0.284846							4.27435	0.27872			4.26444	0.269529																	4.55536	0.288432
		3.95	0.2887							4.53319	0.287015							4.29311	0.280491			4.28318	0.27175																	4.5708	0.289946
		3.75	0.2768							4.54693	0.289076							4.30687	0.28221			4.29692	0.273923																	4.58213	0.291426
		3.91	0.2902							4.55529	0.29097							4.31527	0.283831			4.30529	0.275989																	4.58904	0.292831
		4.65	0.285							4.55806	0.292647							4.31806	0.285309			4.30806	0.277892																	4.59134	0.294124
		4.87	0.302
		IsoLine	IsoLine
[truncated: 38 more columns]

## Sheet: PlotDat21
Source sheet	Appendix 1 U-Pb data	4.16	0.294	2	0.188918	1.95452	0.186061	4.3803	0.304218	5.31134	0.309777	3.87716	0.26222	4.65358	0.287731	5.04463	0.308816	4.43239	0.297075	4.40686	0.305754	5.16304	0.333193	4.43216	0.297899	4.30358	0.2962	5.10582	0.330859	4.21134	0.285024	3.1503	0.240837	4.38254	0.295269	3.37821	0.252805	4.51254	0.296407	4.67239	0.313029	5.16134	0.319241	5.06268	0.326898	4.31806	0.286341	4.55358	0.307845
Plot name	Concordia21	5.14	0.302	2	0.188918	2.2603	0.204603	4.3772	0.306086	5.30751	0.311571	3.87215	0.264635	4.64949	0.289534	5.0416	0.310779	4.42964	0.298547	4.40358	0.307537	5.1605	0.334193	4.4295	0.298918	4.29953	0.297827	5.10146	0.332638	4.20755	0.286194	3.14541	0.24262	4.37739	0.296728	3.37377	0.255584	4.50739	0.297829	4.66967	0.314262	5.15754	0.320782	5.05794	0.328926	4.31349	0.287885	4.54951	0.309884
Plot Type	1	3.51	0.262	2.08894	0.194402	2.59774	0.223435	4.36818	0.307624	5.29635	0.312948	3.85727	0.266977	4.63755	0.290921	5.03282	0.312419	4.42166	0.299707	4.39402	0.308994	5.15304	0.335015	4.42165	0.299791	4.28764	0.299215	5.08874	0.333996	4.19644	0.28705	3.13112	0.243983	4.3623	0.297718	3.36077	0.257993	4.4923	0.298778	4.66173	0.315279	5.14642	0.322008	5.04398	0.330601	4.30002	0.289229	4.53759	0.311614
1st free col	81	4.47	0.28	2.18053	0.199912	2.97009	0.242562	4.35348	0.308791	5.27837	0.313846	3.83291	0.269183	4.61828	0.291831	5.01868	0.313666	4.4088	0.300503	4.37861	0.310062	5.14099	0.335622	4.40897	0.300481	4.26842	0.300307	5.0682	0.334873	4.17849	0.287555	3.10803	0.244866	4.33794	0.298196	3.33957	0.259965	4.46794	0.299212	4.6489	0.316035	5.12846	0.322868	5.02118	0.331877	4.27826	0.290313	4.51835	0.312959
Sigma Level	2	4.91	0.3034	2.27482	0.205446	3.38099	0.261987	4.3335	0.309554	5.25433	0.314227	3.79974	0.271194	4.59254	0.292224	4.99978	0.314463	4.39163	0.300902	4.35801	0.310695	5.12488	0.335988	4.392	0.300957	4.24271	0.301052	5.04075	0.335231	4.15449	0.287685	3.07716	0.24523	4.30536	0.298141	3.31074	0.261447	4.43536	0.299113	4.63175	0.316496	5.10445	0.323322	4.99017	0.332721	4.24913	0.291092	4.49263	0.313859
Absolute Errs	TRUE	4.31	0.2914	2.37192	0.211007	3.83441	0.281716	4.30879	0.309893	5.2253	0.314073	3.75867	0.272953	4.56144	0.292082	4.97696	0.314778	4.37089	0.300885	4.33313	0.310866	5.1054	0.336096	4.3715	0.3012	4.21164	0.30142	5.00758	0.335054	4.12548	0.287435	3.03986	0.24506	4.26599	0.297556	3.27507	0.262399	4.39599	0.298484	4.61103	0.316643	5.07544	0.323351	4.95178	0.333109	4.21393	0.291529	4.46154	0.314277
Symbol Type	1	4.26	0.3001	2.47189	0.216593	4.33477	0.301754	4.28002	0.309798	5.19254	0.313391	3.71081	0.274414	4.52635	0.291413	4.95122	0.314595	4.34748	0.300454	4.30505	0.310565	5.08342	0.335942	4.34835	0.301198	4.17657	0.301393	4.97015	0.334351	4.09274	0.286818	2.99776	0.244362	4.22155	0.296465	3.23354	0.262795	4.35156	0.297353	4.58764	0.316469	5.0427	0.322954	4.90708	0.333029	4.17419	0.291607	4.42646	0.314192
Inverse Plot	FALSE	5.048	0.3301	2.57482	0.222204	4.8869	0.322105	4.24797	0.309273	5.15748	0.312212	3.65748	0.275537	4.48879	0.290244	4.92367	0.313922	4.32244	0.299627	4.275	0.309807	5.05989	0.335533	4.32357	0.300951	4.13902	0.300973	4.93009	0.333152	4.05769	0.285858	2.95269	0.243168	4.17399	0.294918	3.18727	0.262623	4.30399	0.29577	4.5626	0.315981	5.00765	0.322148	4.85727	0.332486	4.13164	0.291322	4.38891	0.31361
Color Plot	TRUE	4.311	0.2956	2.68081	0.227842	5.49618	0.342774	4.21353	0.308331	5.12166	0.310586	3.60012	0.27629	4.45041	0.288628	4.89553	0.31279	4.29685	0.298441	4.2443	0.308625	5.03584	0.334887	4.29824	0.30047	4.10064	0.300178	4.88916	0.331509	4.02187	0.284599	2.90664	0.24153	4.12538	0.29298	3.13753	0.261889	4.25538	0.293803	4.53702	0.315202	4.97183	0.320969	4.80372	0.331492	4.08814	0.290687	4.35053	0.312555
3D plot	FALSE	4.12	0.2924	2.78994	0.233506	IsoLine	IsoLine	4.17763	0.306998	5.08664	0.308585	3.54031	0.276653	4.41289	0.286635	4.86802	0.311248	4.27184	0.296947	4.21428	0.30707	5.01232	0.334031	4.27347	0.299777	4.06311	0.299044	4.84913	0.329494	3.98684	0.283095	2.86161	0.239519	4.07784	0.290737	3.08568	0.260612	4.20784	0.291539	4.512	0.314164	4.9368	0.319468	4.74788	0.330076	4.0456	0.289728	4.313	0.311074
Linear	FALSE	4.91	0.323	2.9023	0.239195			4.14124	0.30531	5.05396	0.306296	3.47967	0.276616	4.37786	0.284352	4.84234	0.309362	4.2485	0.29521	4.18626	0.305211	4.99036	0.333003	4.25033	0.298901	4.02806	0.297619	4.81176	0.327195	3.95414	0.281412	2.81956	0.237223	4.03346	0.288287	3.03312	0.258827	4.16346	0.289077	4.48864	0.312914	4.9041	0.31771	4.69128	0.328277	4.00587	0.288489	4.27796	0.309232
Data Range	O43:S78	4.04	0.279	3.018	0.244911			4.10537	0.303314	5.02503	0.30382	3.41986	0.276181	4.34686	0.281878	4.81962	0.307216	4.22784	0.293307	4.16147	0.303128	4.97092	0.331849	4.22985	0.29788	3.99703	0.295966	4.77869	0.324713	3.92519	0.279623	2.78234	0.234742	3.99417	0.285738	2.9813	0.256584	4.12417	0.286524	4.46796	0.311506	4.87515	0.315772	4.63547	0.326142	3.9707	0.287023	4.24695	0.307108
Filled Symbols	FALSE	2.93	0.233	3.13713	0.250654			4.07099	0.301064	5.00113	0.301263	3.3625	0.275359	4.32125	0.279323	4.80085	0.304903	4.21078	0.291321	4.14098	0.300913	4.95485	0.330618	4.21292	0.29676	3.97138	0.294157	4.75136	0.322156	3.90125	0.277808	2.75158	0.232185	3.96169	0.283199	2.93163	0.253942	4.09169	0.283991	4.45087	0.310002	4.85123	0.31374	4.58196	0.32373	3.94161	0.285394	4.22131	0.304796
ConcAge	FALSE	4.15	0.286	3.25978	0.256422			4.03904	0.298621	4.9833	0.29874	3.30917	0.274173	4.30213	0.276797	4.78685	0.302524	4.19805	0.289338	4.12569	0.298663	4.94285	0.329364	4.20027	0.29559	3.95222	0.292272	4.73096	0.319636	3.88338	0.276044	2.72861	0.229664	3.93744	0.280784	2.88545	0.250975	4.06744	0.281591	4.43812	0.308467	4.83336	0.311701	4.53222	0.321108	3.91988	0.283673	4.20218	0.302397
ConcSwap	FALSE	3.06	0.242	3.38608	0.262218			4.01038	0.296052	4.97231	0.296358	3.26132	0.272655	4.29035	0.274411	4.77823	0.300184	4.19021	0.287445	4.11627	0.296475	4.93544	0.328143	4.19246	0.294419	3.9404	0.290392	4.71838	0.317263	3.87236	0.27441	2.71445	0.227289	3.92248	0.278596	2.84404	0.247763	4.05248	0.279426	4.43025	0.306968	4.82235	0.309746	4.4876	0.318346	3.90646	0.281937	4.19037	0.300015
1st Symbol-row	1	4.28	0.287	3.51612	0.26804			3.98581	0.293428	4.96866	0.294223	3.22025	0.270846	4.28642	0.272269	4.77537	0.297984	4.18761	0.285725	4.11314	0.294446	4.93296	0.327007	4.18984	0.293301	3.93642	0.2886	4.71418	0.315141	3.86866	0.272976	2.7097	0.225163	3.91746	0.276731	2.80852	0.244394	4.04746	0.277593	4.42761	0.305571	4.81866	0.307959	4.44932	0.315521	3.90194	0.280259	4.18642	0.297755
		4.55	0.3093	3.65001	0.273889			3.96599	0.290818	4.97249	0.292429	3.18709	0.268795	4.29051	0.270466	4.7784	0.296021	4.19036	0.284253	4.11642	0.292663	4.9355	0.326007	4.1925	0.292282	3.94047	0.286973	4.71854	0.313362	3.87245	0.271806	2.71459	0.22338	3.92261	0.275272	2.77986	0.24096	4.05261	0.276171	4.43033	0.304338	4.82246	0.306418	4.41842	0.312708	3.90651	0.278715	4.19049	0.295716
		4.99	0.3136	3.78788	0.279765			3.95146	0.288296	4.98365	0.291052	3.16273	0.26656	4.30245	0.269079	4.78718	0.294381	4.19834	0.283093	4.12598	0.291206	4.94296	0.325185	4.20035	0.291409	3.95236	0.285585	4.73126	0.312004	3.88356	0.27095	2.72888	0.222017	3.9377	0.274282	2.75884	0.237554	4.0677	0.275222	4.43827	0.303321	4.83358	0.305192	4.39575	0.309985	3.91998	0.277371	4.20241	0.293986
		4.72	0.316	3.92983	0.285668			3.94261	0.285929	5.00163	0.290154	3.14784	0.2642	4.32172	0.268169	4.80132	0.293134	4.2112	0.282297	4.14139	0.290138	4.95501	0.324578	4.21303	0.290719	3.97158	0.284493	4.7518	0.311127	3.90151	0.270445	2.75197	0.221134	3.96206	0.273804	2.74603	0.234269	4.09206	0.274788	4.4511	0.302565	4.85154	0.304332	4.38192	0.307427	3.94174	0.276287	4.22165	0.292641
		4.11	0.2833	4.07599	0.291598			3.9397	0.283782	5.02567	0.289773	3.14284	0.26178	4.34746	0.267776	4.82022	0.292337	4.22837	0.281898	4.16199	0.289505	4.97112	0.324212	4.23	0.290243	3.99729	0.283748	4.77925	0.310769	3.92551	0.270315	2.78284	0.22077	3.99464	0.273859	2.74179	0.231195	4.12464	0.274887	4.46825	0.302104	4.87555	0.303878	4.37732	0.305102	3.97087	0.275508	4.24737	0.291741
		4.37	0.3028	4.22648	0.297556			3.9428	0.281914	5.0547	0.289927	3.14785	0.259365	4.37856	0.267918	4.84304	0.292022	4.24911	0.281915	4.18687	0.289334	4.9906	0.324104	4.2505	0.29	4.02836	0.28338	4.81242	0.310946	3.95452	0.270565	2.82014	0.22094	4.03401	0.274444	2.74623	0.228416	4.16401	0.275516	4.48897	0.301957	4.90456	0.303849	4.38206	0.303074	4.00607	0.275071	4.27846	0.291323
		4.56	0.3068	4.38144	0.303541			3.95182	0.280376	5.08746	0.290609	3.16273	0.257023	4.41365	0.268587	4.86878	0.292205	4.27252	0.282346	4.21495	0.289635	5.01258	0.324258	4.27365	0.290002	4.06343	0.283407	4.84985	0.311649	3.98726	0.271182	2.86224	0.221638	4.07845	0.275535	2.75923	0.226007	4.20844	0.276647	4.51236	0.302131	4.9373	0.304246	4.39602	0.301399	4.04581	0.274993	4.31354	0.291408
		4.2	0.289	4.54099	0.309554			3.96652	0.279209	5.12252	0.291788	3.18709	0.254817	4.45121	0.269756	4.89633	0.292878	4.29756	0.283173	4.245	0.290393	5.03611	0.324667	4.29843	0.290249	4.10098	0.283827	4.88991	0.312848	4.02231	0.272142	2.90731	0.222832	4.12601	0.277082	2.78043	0.224035	4.25601	0.27823	4.5374	0.302619	4.97235	0.305052	4.41882	0.300123	4.08836	0.275278	4.35109	0.29199
		3.85	0.281	4.70527	0.315594			3.9865	0.278446	5.15834	0.293414	3.22026	0.252806	4.48959	0.271372	4.92447	0.29401	4.32315	0.284359	4.2757	0.291575	5.06016	0.325313	4.32376	0.29073	4.13936	0.284622	4.93084	0.314491	4.05813	0.273401	2.95336	0.22447	4.17462	0.27902	2.80926	0.222553	4.30462	0.280197	4.56298	0.303398	5.00817	0.306231	4.44983	0.299279	4.13186	0.275913	4.38947	0.293045
		3.84	0.275	4.87442	0.321663			4.01121	0.278107	5.19336	0.295415	3.26133	0.251047	4.52711	0.273365	4.95198	0.295552	4.34816	0.285853	4.30572	0.29313	5.08368	0.326169	4.34853	0.291423	4.17689	0.285756	4.97087	0.316506	4.09316	0.274905	2.99839	0.226481	4.22216	0.281263	2.84493	0.221601	4.35216	0.282461	4.588	0.304436	5.0432	0.307732	4.48822	0.298891	4.1744	0.276872	4.427	0.294526
		4.52	0.3028	5.04858	0.327759			4.03998	0.278202	5.22604	0.297704	3.30919	0.249586	4.56214	0.275648	4.97766	0.297438	4.3715	0.28759	4.33374	0.294989	5.10564	0.327197	4.37167	0.292299	4.21194	0.287181	5.00824	0.318805	4.12586	0.276588	3.04044	0.228777	4.26654	0.283713	2.88646	0.221205	4.39654	0.284923	4.61136	0.305686	5.0759	0.30949	4.53292	0.298971	4.21413	0.278111	4.46204	0.296368
		4.17	0.2857	5.22791	0.333884			4.07203	0.278727	5.25497	0.30018	3.36252	0.248463	4.59314	0.278122	5.00038	0.299584	4.39216	0.289493	4.35853	0.297072	5.12508	0.328351	4.39215	0.29332	4.24297	0.288834	5.04131	0.321287	4.15481	0.278377	3.07766	0.231258	4.30583	0.286262	2.93273	0.221377	4.43583	0.287476	4.63204	0.307094	5.10485	0.311428	4.58273	0.299514	4.2493	0.279577	4.49305	0.298492
		4.38	0.2947	5.41256	0.340036			4.10647	0.279669	5.27887	0.302737	3.41988	0.24771	4.61875	0.280677	5.01915	0.301897	4.40922	0.291479	4.37902	0.299287	5.14115	0.329582	4.40908	0.29444	4.26862	0.290643	5.06864	0.323844	4.17875	0.280192	3.10842	0.233815	4.33831	0.288801	2.98247	0.222111	4.46831	0.290009	4.64913	0.308598	5.12877	0.31346	4.63628	0.300508	4.27839	0.281206	4.51869	0.300804
		4.44	0.293	5.60268	0.346217			4.14237	0.281002	5.2967	0.30526	3.47969	0.247347	4.63787	0.283203	5.03315	0.304276	4.42195	0.293462	4.39431	0.301537	5.15315	0.330836	4.42173	0.29561	4.28778	0.292528	5.08904	0.326364	4.19662	0.281956	3.13139	0.236336	4.36256	0.291216	3.03432	0.223388	4.49256	0.292409	4.66188	0.310133	5.14664	0.315499	4.69212	0.301924	4.30012	0.282927	4.53782	0.303203
		4.56	0.3038	5.79844	0.352427			4.17876	0.28269	5.30769	0.307642	3.54033	0.247384	4.64965	0.285589	5.04177	0.306616	4.42979	0.295355	4.40373	0.303725	5.16056	0.332057	4.42954	0.296781	4.2996	0.294408	5.10162	0.328737	4.20764	0.28359	3.14555	0.238711	4.37752	0.293404	3.08688	0.225173	4.50752	0.294574	4.66975	0.311632	5.15765	0.317454	4.74872	0.303723	4.31354	0.284663	4.54963	0.305585
		4.596	0.3114	6	0.358665			4.21463	0.284686	5.31134	0.309777	3.60014	0.247819	4.65358	0.287731	5.04463	0.308816	4.43239	0.297075	4.40686	0.305754	5.16304	0.333193	4.43216	0.297899	4.30358	0.2962	5.10582	0.330859	4.21134	0.285024	3.1503	0.240837	4.38254	0.295269	3.1387	0.227416	4.51254	0.296407	4.67239	0.313029	5.16134	0.319241	4.80453	0.305858	4.31806	0.286341	4.55358	0.307845
		4.3	0.2907	6	0.358665			4.24901	0.286936			3.6575	0.248641																							3.18837	0.230058							4.85804	0.30827
		4.44	0.294	IsoLine	IsoLine			4.28096	0.289379			3.71083	0.249827																							3.23455	0.233025							4.90778	0.310892
		4.32	0.2989					4.30962	0.291948			3.75868	0.251345																							3.27596	0.236237							4.9524	0.313654
		3.98	0.298					4.33419	0.294572			3.79975	0.253154																							3.31148	0.239606							4.99068	0.316479
		5.26	0.3516					4.35401	0.297182			3.83291	0.255205																							3.34014	0.24304							5.02158	0.319292
		IsoLine	IsoLine					4.36854	0.299704			3.85727	0.25744																							3.36116	0.246446							5.04425	0.322015
								4.37739	0.302071			3.87216	0.2598																							3.37397	0.249731							5.05808	0.324573
								4.3803	0.304218			3.87716	0.26222																							3.37821	0.252805							5.06268	0.326898
[truncated: 30 more columns]

## Sheet: PlotDat22
Source sheet	Appendix 1 U-Pb data	4.37	0.3006	1.4286	0.15	1.19873	0.132129	4.5291	0.30776	5.23239	0.326328	4.0691	0.282653	5.22806	0.320737	5.12134	0.322961	9.93373	0.45318	4.69477	0.307879	4.41686	0.296498	4.2891	0.292908	4.6991	0.318918	4.5291	0.308756	3.91463	0.274412	3.83358	0.282257	4.4791	0.303299	4.86149	0.314656	4.47358	0.297211	4.80806	0.310884	5.18134	0.335009	5.09134	0.324692	8.78164	0.413989	4.18463	0.289425
Plot name	Concordia22	5.11	0.3191	1.4286	0.15	1.67741	0.167804	4.52256	0.309691	5.22732	0.327896	4.06259	0.284283	5.21951	0.323269	5.1143	0.324679	9.92173	0.45541	4.68476	0.310635	4.41074	0.299096	4.28255	0.29468	4.69254	0.320902	4.5225	0.310974	3.90912	0.276696	3.82602	0.285158	4.47256	0.305523	4.84998	0.316701	4.46603	0.299435	4.79955	0.313044	5.17428	0.33703	5.08432	0.326727	8.76566	0.416368	4.17907	0.290991
Plot Type	1	3.91	0.277	1.61614	0.163553	2.2603	0.204603	4.50365	0.310884	5.21275	0.328751	4.04372	0.285323	5.1948	0.324887	5.09395	0.325589	9.8869	0.456554	4.65573	0.31253	4.39322	0.300794	4.26364	0.295652	4.67362	0.32206	4.50354	0.312223	3.89315	0.278552	3.8042	0.287235	4.45365	0.307049	4.8166	0.317636	4.44422	0.300814	4.77488	0.314504	5.15391	0.338181	5.06398	0.328089	8.71925	0.41734	4.16305	0.29182
1st free col	193	5.02	0.312	1.81817	0.177267	2.97009	0.242562	4.47392	0.311245	5.18985	0.328825	4.01401	0.285689	5.15592	0.325462	5.06194	0.325616	9.83208	0.456519	4.61003	0.31341	4.36572	0.301456	4.2339	0.295744	4.64387	0.322298	4.47376	0.3124	3.86802	0.279827	3.76988	0.288322	4.42392	0.307752	4.76406	0.317385	4.40991	0.301236	4.73605	0.315145	5.12188	0.338369	5.03198	0.328665	8.64616	0.416826	4.13788	0.291846
Sigma Level	2	4.95	0.3147	2.03579	0.191141	3.83441	0.281716	4.43577	0.310743	5.16049	0.32811	3.97588	0.285351	5.10604	0.324946	5.02086	0.324759	9.76169	0.455308	4.55136	0.313203	4.33046	0.301028	4.19575	0.29495	4.60571	0.321595	4.43558	0.311491	3.83575	0.280421	3.72585	0.288329	4.38577	0.307576	4.6966	0.315969	4.36589	0.300666	4.68619	0.314916	5.08079	0.33758	4.99091	0.328409	8.55232	0.414868	4.10559	0.291066
Absolute Errs	TRUE	9.64	0.442	2.27023	0.20518	4.8869	0.322105	4.39229	0.309419	5.12703	0.326666	3.93241	0.284337	5.04918	0.323382	4.97404	0.323088	9.68144	0.453018	4.48449	0.311926	4.2903	0.299545	4.15227	0.293334	4.56222	0.320011	4.39208	0.309571	3.79897	0.280283	3.67568	0.287257	4.34229	0.306536	4.61969	0.313502	4.31572	0.299152	4.62934	0.313835	5.03396	0.335877	4.94409	0.327343	8.44533	0.411625	4.06879	0.289543
Symbol Type	1	4.45	0.3	2.52277	0.219384	6.16853	0.363766	4.34701	0.307381	5.0922	0.324609	3.88713	0.282728	4.98996	0.320895	4.92527	0.320737	9.59784	0.449836	4.41482	0.309684	4.2485	0.297126	4.10698	0.291026	4.51694	0.317671	4.34679	0.306794	3.76065	0.279426	3.62343	0.285191	4.29701	0.304714	4.53957	0.310185	4.26347	0.296815	4.57012	0.311989	4.98519	0.333398	4.89532	0.325552	8.33386	0.407358	4.03047	0.287401
Inverse Plot	FALSE	4.27	0.288	2.7948	0.233755	7.72917	0.40674	4.30358	0.304794	5.0588	0.322105	3.84369	0.280655	4.93318	0.317687	4.8785	0.317896	9.51765	0.446019	4.348	0.306657	4.20844	0.293968	4.06356	0.288214	4.47352	0.314768	4.30339	0.303386	3.7239	0.277918	3.57333	0.2823	4.25358	0.30226	4.46273	0.306285	4.21337	0.293844	4.51333	0.309529	4.93843	0.330344	4.84855	0.323182	8.22694	0.402415	3.99374	0.284814
Color Plot	TRUE	4.13	0.2848	3.08785	0.248295	9.62957	0.451068	4.26554	0.301866	5.02956	0.319358	3.80563	0.278286	4.88343	0.314019	4.83753	0.314797	9.44737	0.441877	4.28944	0.30309	4.17337	0.290326	4.02552	0.285125	4.43549	0.311534	4.26538	0.299622	3.69169	0.275883	3.52944	0.278817	4.21554	0.299371	4.39538	0.302119	4.16947	0.290482	4.46355	0.306653	4.89747	0.326962	4.80757	0.320424	8.13322	0.397195	3.96156	0.28199
3D plot	FALSE	4.54	0.3107	3.40353	0.263007	11.9437	0.496793	4.23596	0.298837	5.00683	0.31659	3.77603	0.275813	4.84474	0.310188	4.80567	0.31169	9.3927	0.437744	4.24389	0.299273	4.14612	0.286496	3.99595	0.28201	4.40592	0.308233	4.23585	0.295808	3.66664	0.273484	3.49532	0.275025	4.18596	0.296282	4.34299	0.298025	4.13534	0.286999	4.42483	0.303595	4.86563	0.323527	4.7757	0.317503	8.06031	0.392121	3.93655	0.279159
Linear	FALSE	4.37	0.299	3.74358	0.277893	14.7617	0.543959	4.21724	0.29595	4.99246	0.314026	3.75728	0.273436	4.82025	0.306503	4.7855	0.308827	9.35807	0.433957	4.21504	0.295516	4.12892	0.282788	3.97723	0.279121	4.38722	0.305132	4.21718	0.292253	3.65077	0.270916	3.47373	0.271232	4.16724	0.293243	4.30981	0.294333	4.11374	0.283679	4.40029	0.300602	4.84548	0.320316	4.75551	0.314654	8.01411	0.387604	3.92072	0.27655
Data Range	D2:H93	3.78	0.2714	4.10989	0.292953	18.1931	0.592611	4.2109	0.29344	4.98761	0.311872	3.7509	0.271347	4.81194	0.303263	4.77866	0.306439	9.34627	0.43082	4.20523	0.292121	4.12314	0.279502	3.9709	0.276692	4.3809	0.302482	4.2109	0.289244	3.64537	0.268388	3.46642	0.267743	4.1609	0.290501	4.29851	0.291344	4.10642	0.280789	4.39194	0.297916	4.83866	0.317591	4.74866	0.312108	7.99836	0.384011	3.91537	0.274375
Filled Symbols	FALSE	3.65	0.275	4.5045	0.308192	IsoLine	IsoLine	4.21744	0.291509	4.99268	0.310304	3.75741	0.269717	4.82049	0.300731	4.7857	0.304721	9.35827	0.42859	4.21524	0.289365	4.12926	0.276904	3.97745	0.27492	4.38746	0.300498	4.2175	0.287026	3.65088	0.266104	3.47398	0.264842	4.16744	0.288277	4.31002	0.289299	4.11397	0.278565	4.40045	0.295756	4.84572	0.31557	4.75568	0.310073	8.01434	0.381632	3.92093	0.272809
ConcAge	FALSE	4.32	0.2969	4.92957	0.32361			4.23635	0.290316	5.00725	0.309449	3.77628	0.268677	4.8452	0.299113	4.80605	0.303811	9.3931	0.427446	4.24427	0.28747	4.14678	0.275206	3.99636	0.273948	4.40638	0.29934	4.23646	0.285777	3.66685	0.264248	3.4958	0.262765	4.18635	0.286751	4.3434	0.288364	4.13578	0.277186	4.42512	0.294296	4.86609	0.314419	4.77602	0.308711	8.06075	0.38066	3.93695	0.27198
ConcSwap	FALSE	4.58	0.303	5.38747	0.339209			4.26608	0.289955	5.03015	0.309375	3.80599	0.268311	4.88408	0.298538	4.83806	0.303784	9.44792	0.427481	4.28997	0.28659	4.17428	0.274544	4.0261	0.273856	4.43613	0.299102	4.26624	0.2856	3.69198	0.262973	3.53012	0.261678	4.21608	0.286048	4.39594	0.288615	4.17009	0.276764	4.46395	0.293655	4.89812	0.314231	4.80802	0.308135	8.13384	0.381174	3.96212	0.271954
1st Symbol-row	1	4.29	0.289	5.88073	0.354993			4.30423	0.290457	5.05951	0.31009	3.84412	0.268649	4.93396	0.299054	4.87914	0.304641	9.51831	0.428692	4.34864	0.286797	4.20954	0.274972	4.06425	0.27465	4.47429	0.299805	4.30442	0.286509	3.72425	0.262379	3.57415	0.261671	4.25423	0.286224	4.4634	0.290031	4.21411	0.277334	4.51381	0.293884	4.93921	0.31502	4.84909	0.308391	8.22768	0.383132	3.99441	0.272734
		4.6	0.3044	6.41208	0.370962			4.34771	0.291781	5.09297	0.311534	3.88759	0.269663	4.99082	0.300618	4.92596	0.306312	9.59856	0.430982	4.41551	0.288074	4.2497	0.276455	4.10773	0.276266	4.51778	0.301389	4.34792	0.288429	3.76103	0.262517	3.62432	0.262743	4.29771	0.287264	4.54031	0.292498	4.26428	0.278848	4.57066	0.294965	4.98604	0.316723	4.89591	0.309457	8.33467	0.386375	4.03121	0.274257
		5.01	0.3263	6.98447	0.38712			4.39299	0.293819	5.1278	0.313591	3.93287	0.271272	5.05004	0.303105	4.97473	0.308663	9.68216	0.434164	4.48518	0.290316	4.2915	0.278874	4.15302	0.278574	4.56306	0.303729	4.39321	0.291206	3.79935	0.263374	3.67657	0.264809	4.34299	0.289086	4.62043	0.295815	4.31653	0.281185	4.62988	0.296811	5.03481	0.319202	4.94468	0.311248	8.44614	0.390642	4.06953	0.276399
		4.92	0.3184	7.60105	0.403468			4.43642	0.296406	5.1612	0.316095	3.97631	0.273345	5.10682	0.306313	5.0215	0.311504	9.76235	0.437981	4.552	0.293343	4.33156	0.282032	4.19644	0.281386	4.60648	0.306632	4.43661	0.294614	3.8361	0.264882	3.72667	0.2677	4.38642	0.29154	4.69727	0.299715	4.36663	0.284156	4.68667	0.299271	5.08157	0.322256	4.99145	0.313618	8.55306	0.395585	4.10626	0.278986
		8.39	0.399	8.26525	0.420008			4.47446	0.299334	5.19044	0.318842	4.01437	0.275714	5.15657	0.309981	5.06247	0.314603	9.83263	0.442123	4.61056	0.29691	4.36663	0.285674	4.23448	0.284475	4.64451	0.309866	4.47462	0.298378	3.86831	0.266917	3.77056	0.271183	4.42446	0.294429	4.76462	0.303881	4.41053	0.287518	4.73645	0.302147	5.12253	0.325638	5.03243	0.316376	8.64678	0.400805	4.13844	0.28181
		4.05	0.2819	8.98074	0.436744			4.50404	0.302363	5.21317	0.32161	4.04397	0.278187	5.19526	0.313812	5.09433	0.31771	9.8873	0.446256	4.65611	0.300727	4.39388	0.289504	4.26405	0.28759	4.67408	0.313167	4.50415	0.302192	3.89336	0.269316	3.80468	0.274975	4.45404	0.297518	4.81701	0.307975	4.44466	0.291001	4.77517	0.305205	5.15437	0.329073	5.0643	0.319297	8.71969	0.405879	4.16345	0.284641
		4.82	0.311	9.75149	0.453677			4.52276	0.30525	5.22754	0.324174	4.06272	0.280564	5.21975	0.317497	5.1145	0.320573	9.92193	0.450043	4.68496	0.304484	4.41108	0.293212	4.28277	0.290479	4.69278	0.316268	4.52282	0.305747	3.90923	0.271884	3.82627	0.278768	4.47276	0.300557	4.85019	0.311667	4.46626	0.294321	4.79971	0.308198	5.17452	0.332284	5.08449	0.322146	8.76589	0.410396	4.17928	0.28725
		4.87	0.3229	10.5817	0.47081			4.5291	0.30776	5.23239	0.326328	4.0691	0.282653	5.22806	0.320737	5.12134	0.322961	9.93373	0.45318	4.69477	0.307879	4.41686	0.296498	4.2891	0.292908	4.6991	0.318918	4.5291	0.308756	3.91463	0.274412	3.83358	0.282257	4.4791	0.303299	4.86149	0.314656	4.47358	0.297211	4.80806	0.310884	5.18134	0.335009	5.09134	0.324692	8.78164	0.413989	4.18463	0.289425
		4.14	0.2776	11.4761	0.488144
		4.478	0.3046	12.4396	0.505683
		5.22	0.3277	13.4774	0.523428
		4.7	0.3146	14.5954	0.541383
		5.05	0.326	15.7997	0.559549
		4.42	0.302	17.0971	0.577929
		4.87	0.3074	18.4946	0.596526
		3.85	0.26	20	0.615342
		5.1	0.3234	20	0.615342
		4.92	0.314	IsoLine	IsoLine
		4.44	0.307
		4.02	0.2778
		4.48	0.3081
		4.56	0.2996
		9.13	0.413
		4.204	0.2922
		5.11	0.33
		4.84	0.3215
		5.57	0.3459
		4.58	0.3099
		3.67	0.267
		3.67	0.2683
		5.02	0.324
		4.55	0.3026
		4.83	0.3121
		4.22	0.282
		11.03	0.478
		4.4	0.304
		5.29	0.337
		4.22	0.2965
		4.66	0.305
		16.61	0.542
		4.58	0.309
		4.18	0.2906
		4.63	0.314
		4.43	0.309
		5.09	0.3345
		4.73	0.313
		4.08	0.281
		10.22	0.457
		5.08	0.3296
		6.09	0.354
		3.95	0.285
		4.67	0.3132
		4.46	0.312
		10.56	0.461
		4.33	0.3039
		4.2	0.284
		4.512	0.304
		4.68	0.3203
		4.6	0.3167
		4.29	0.2942
		5.53	0.345
		15.6	0.535
		5.15	0.3308
		7.78	0.396
		3.95	0.2852
		3.77	0.2695
		10.44	0.462
		4.65	0.316
		5.77	0.353
		4.45	0.301
		4.724	0.3173
		4.28	0.286
		4.45	0.296
		5.37	0.337
		4.23	0.291
		4.03	0.272
		4.21	0.294
		IsoLine	IsoLine
[truncated: 142 more columns]
